# Supplementary material
Source: publisher site journal article supplement (https://www.degruyterbrill.com/publication/isbn/9783110221343/downloadAsset/9783110221343_Titel_01.pdf)

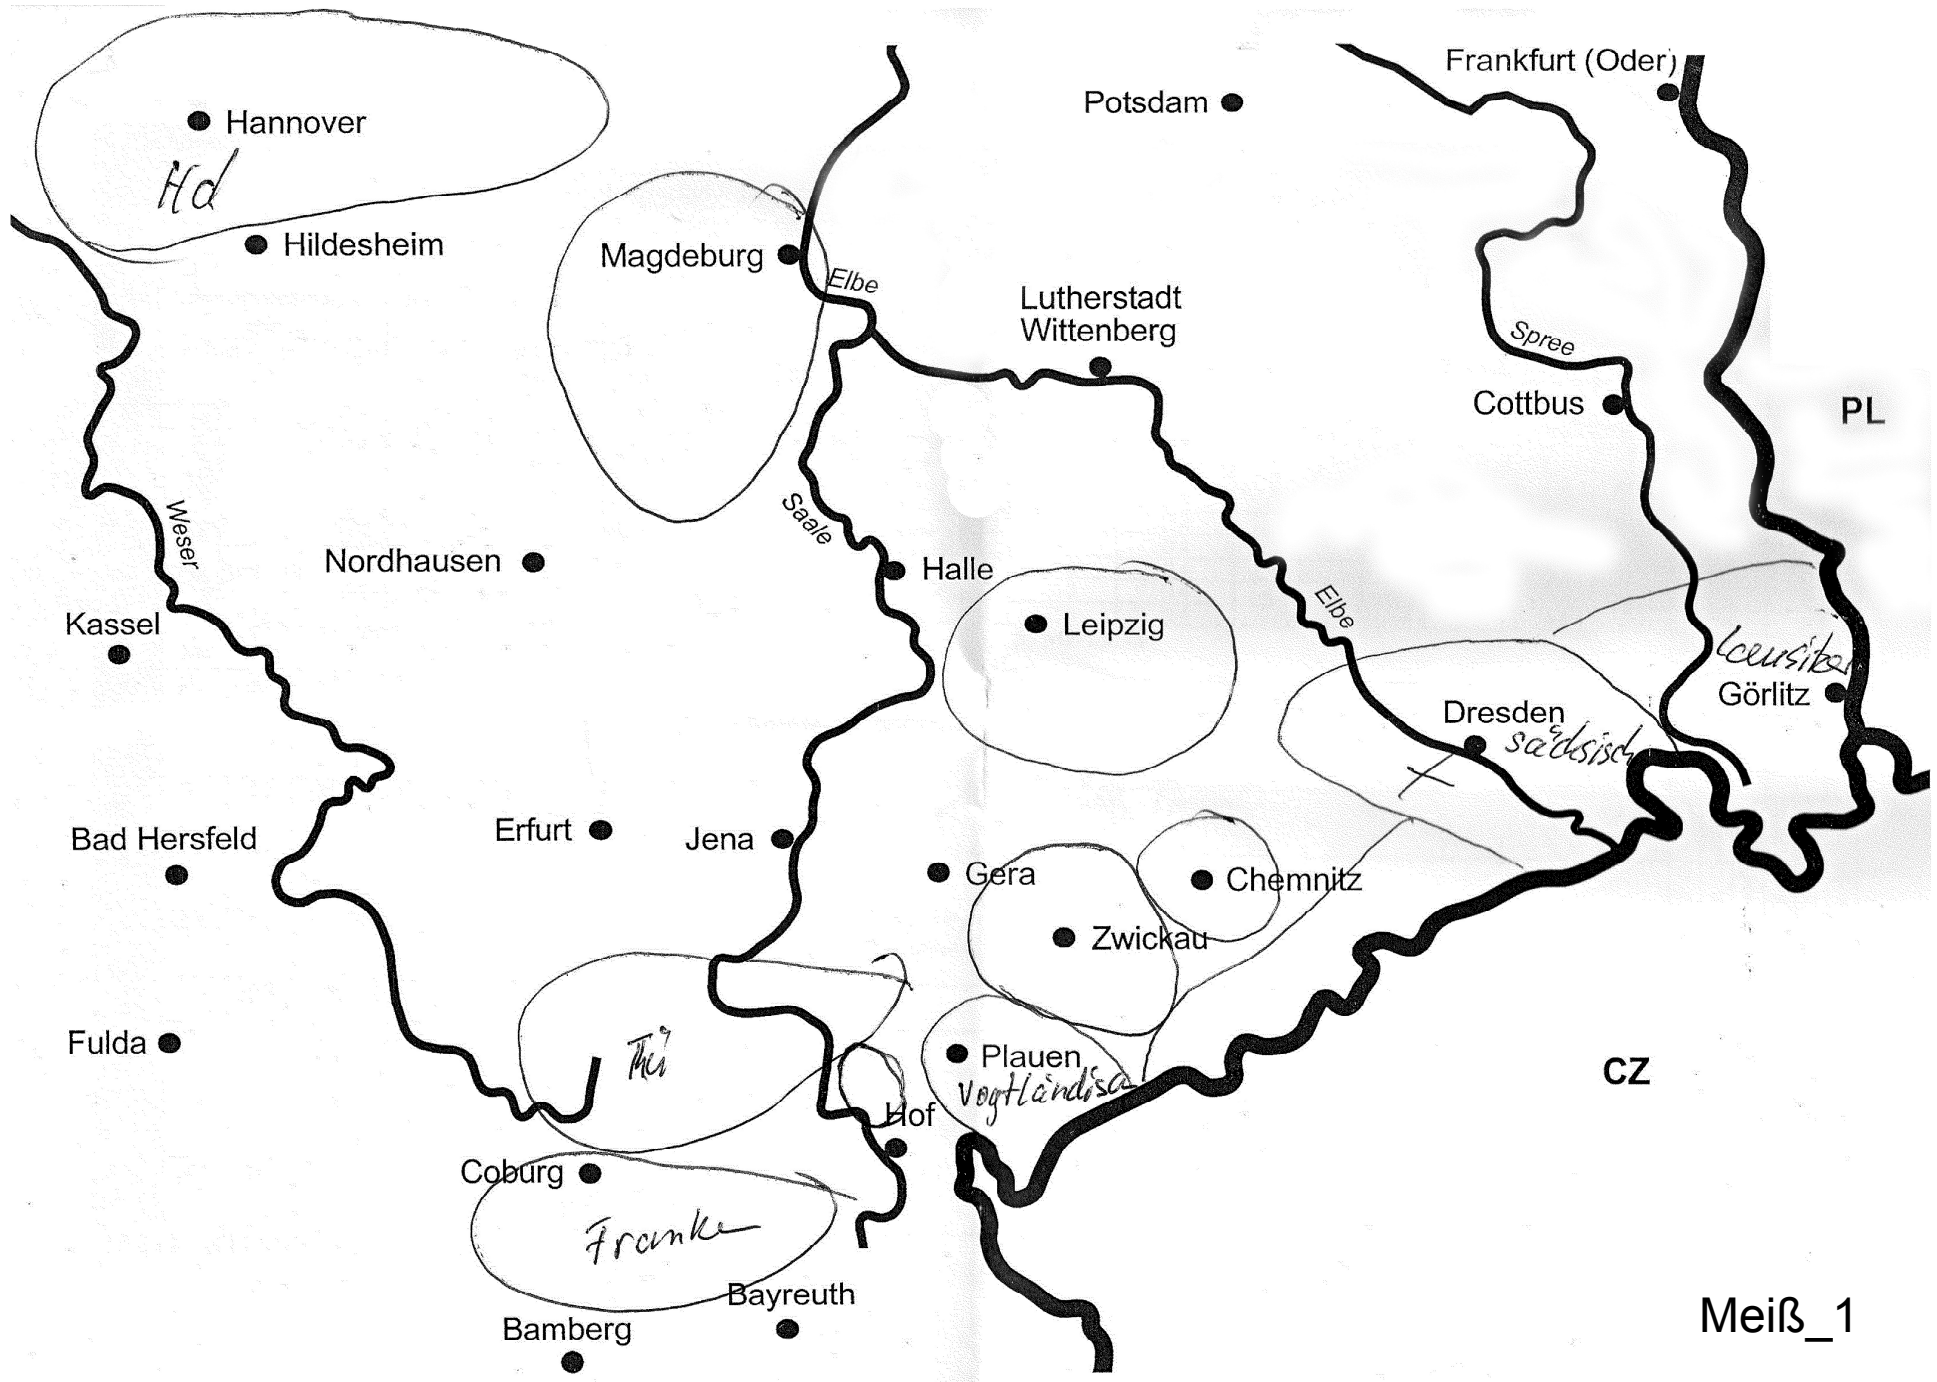

Meiß\_1

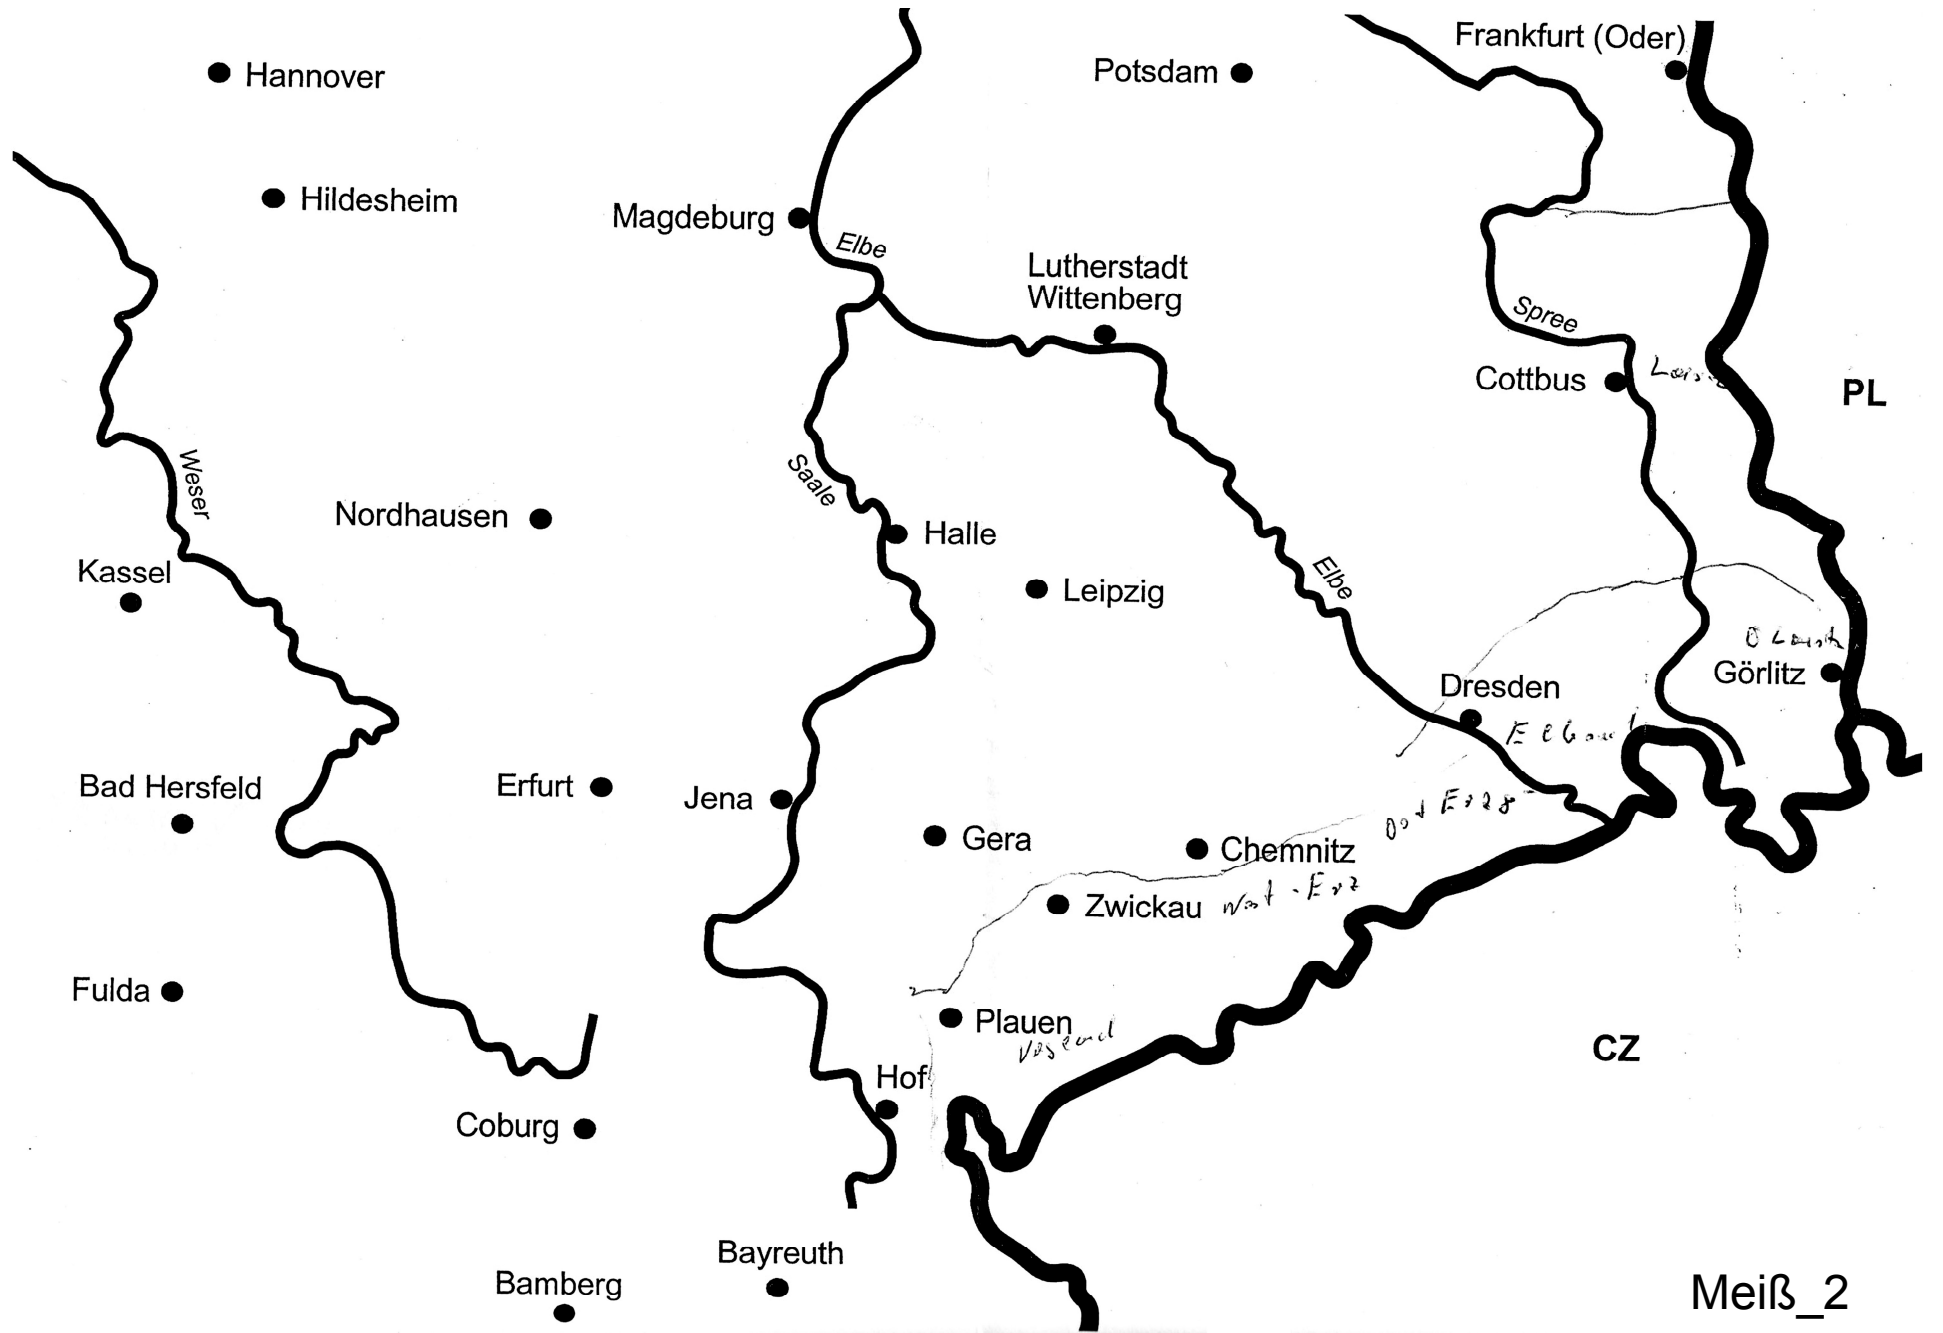

Meiß\_2

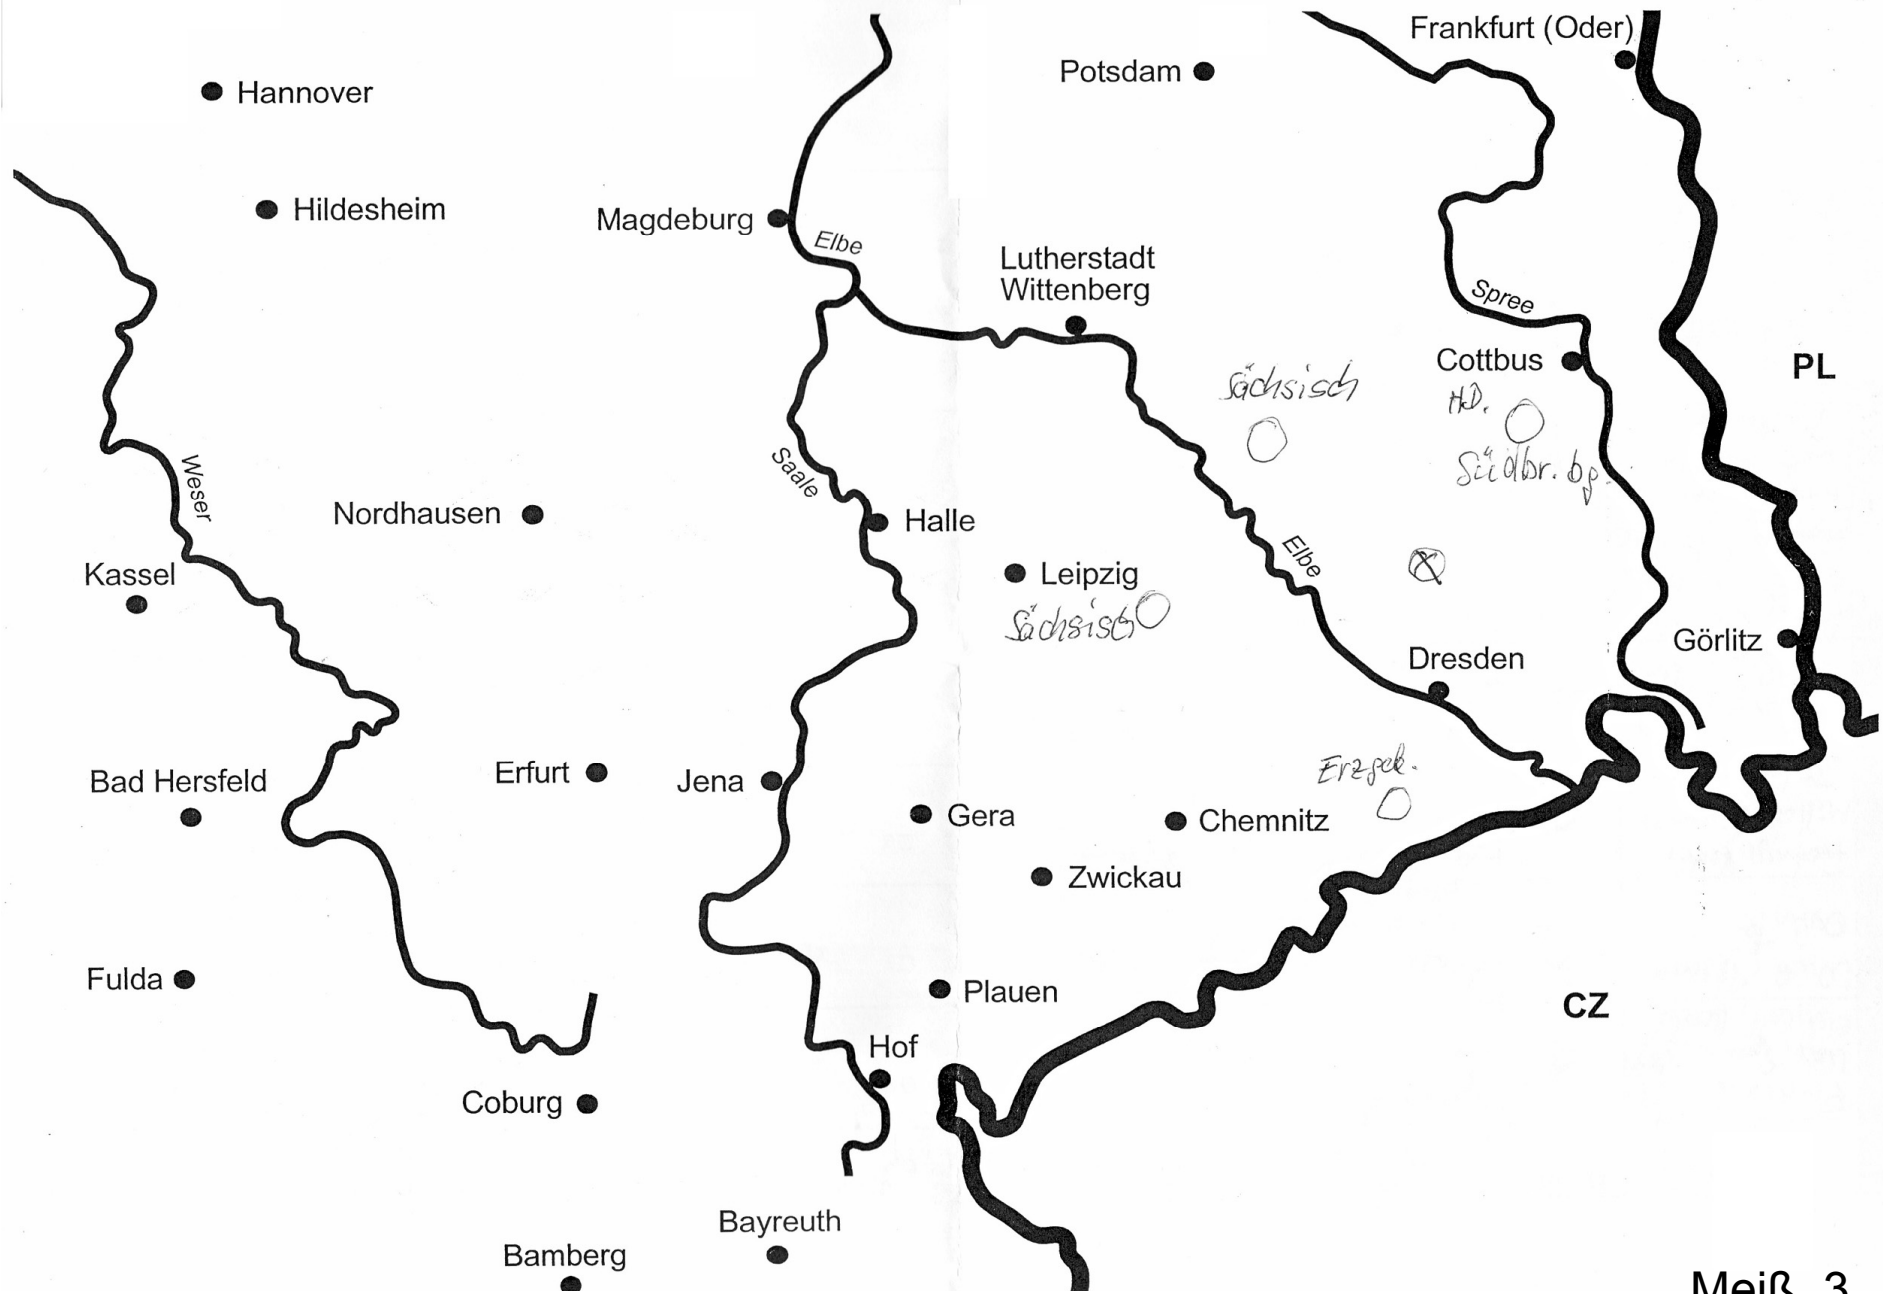

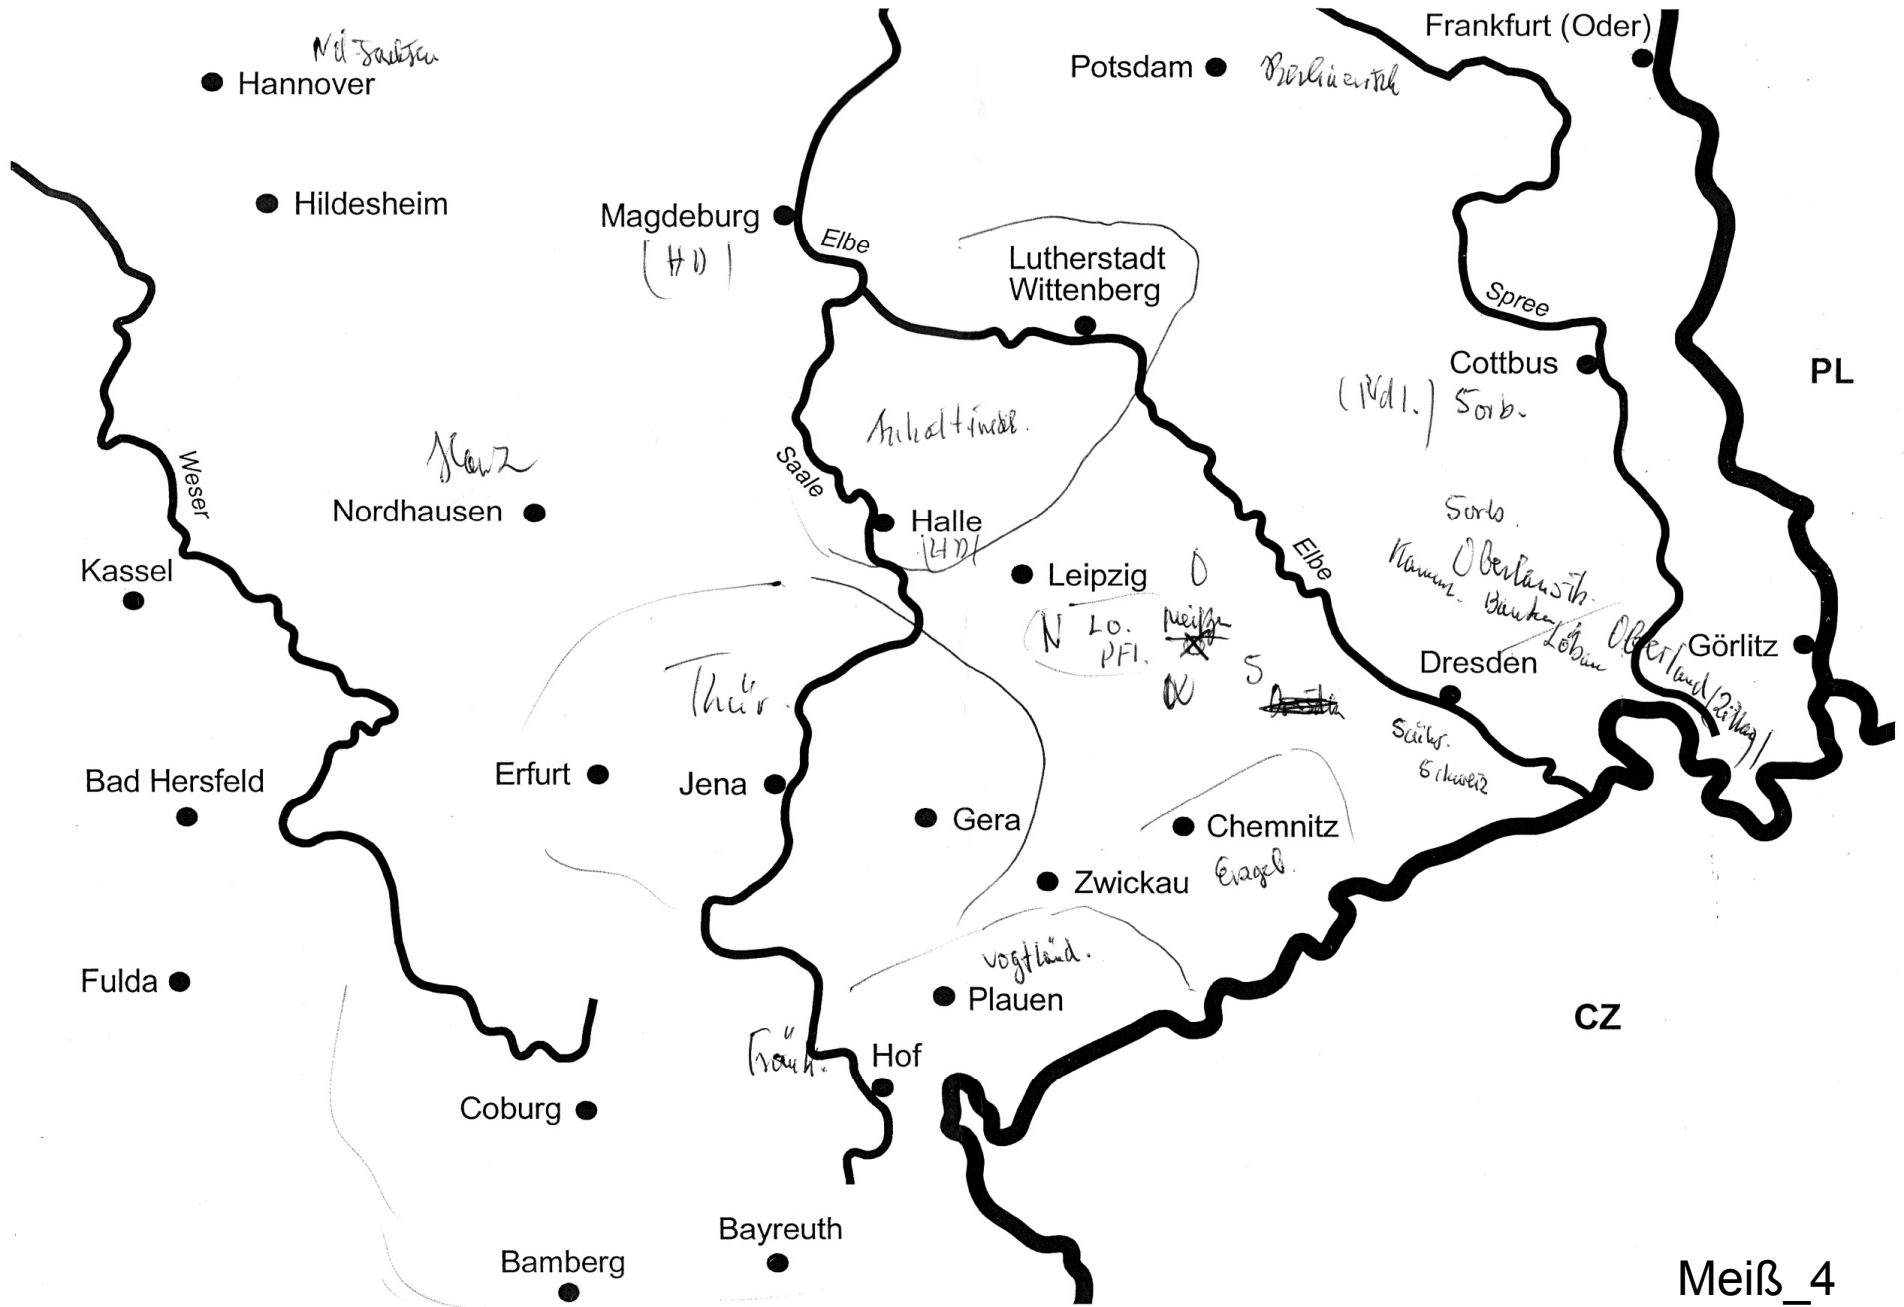





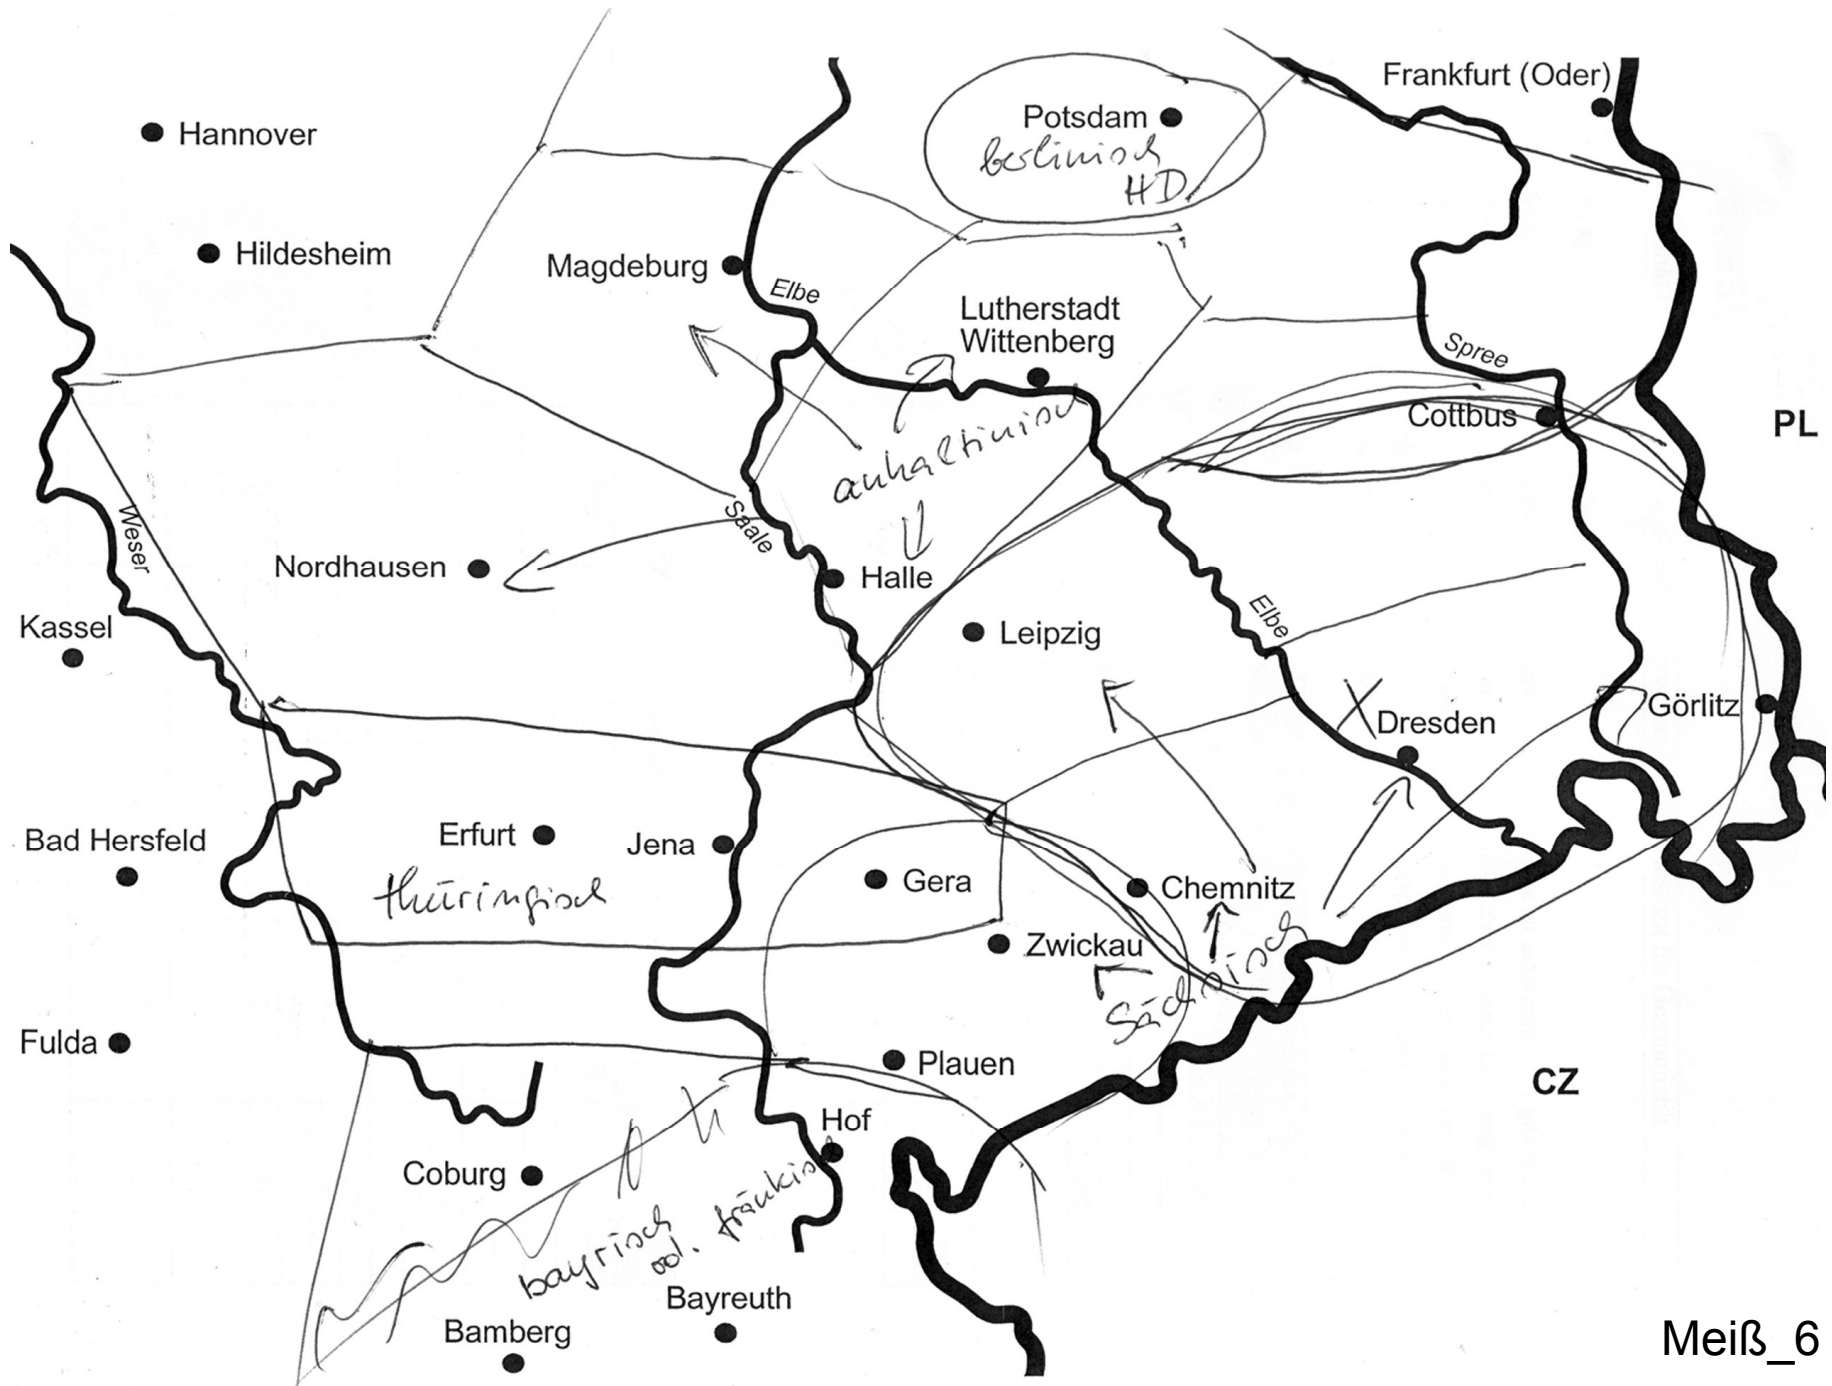

Meiß\_6

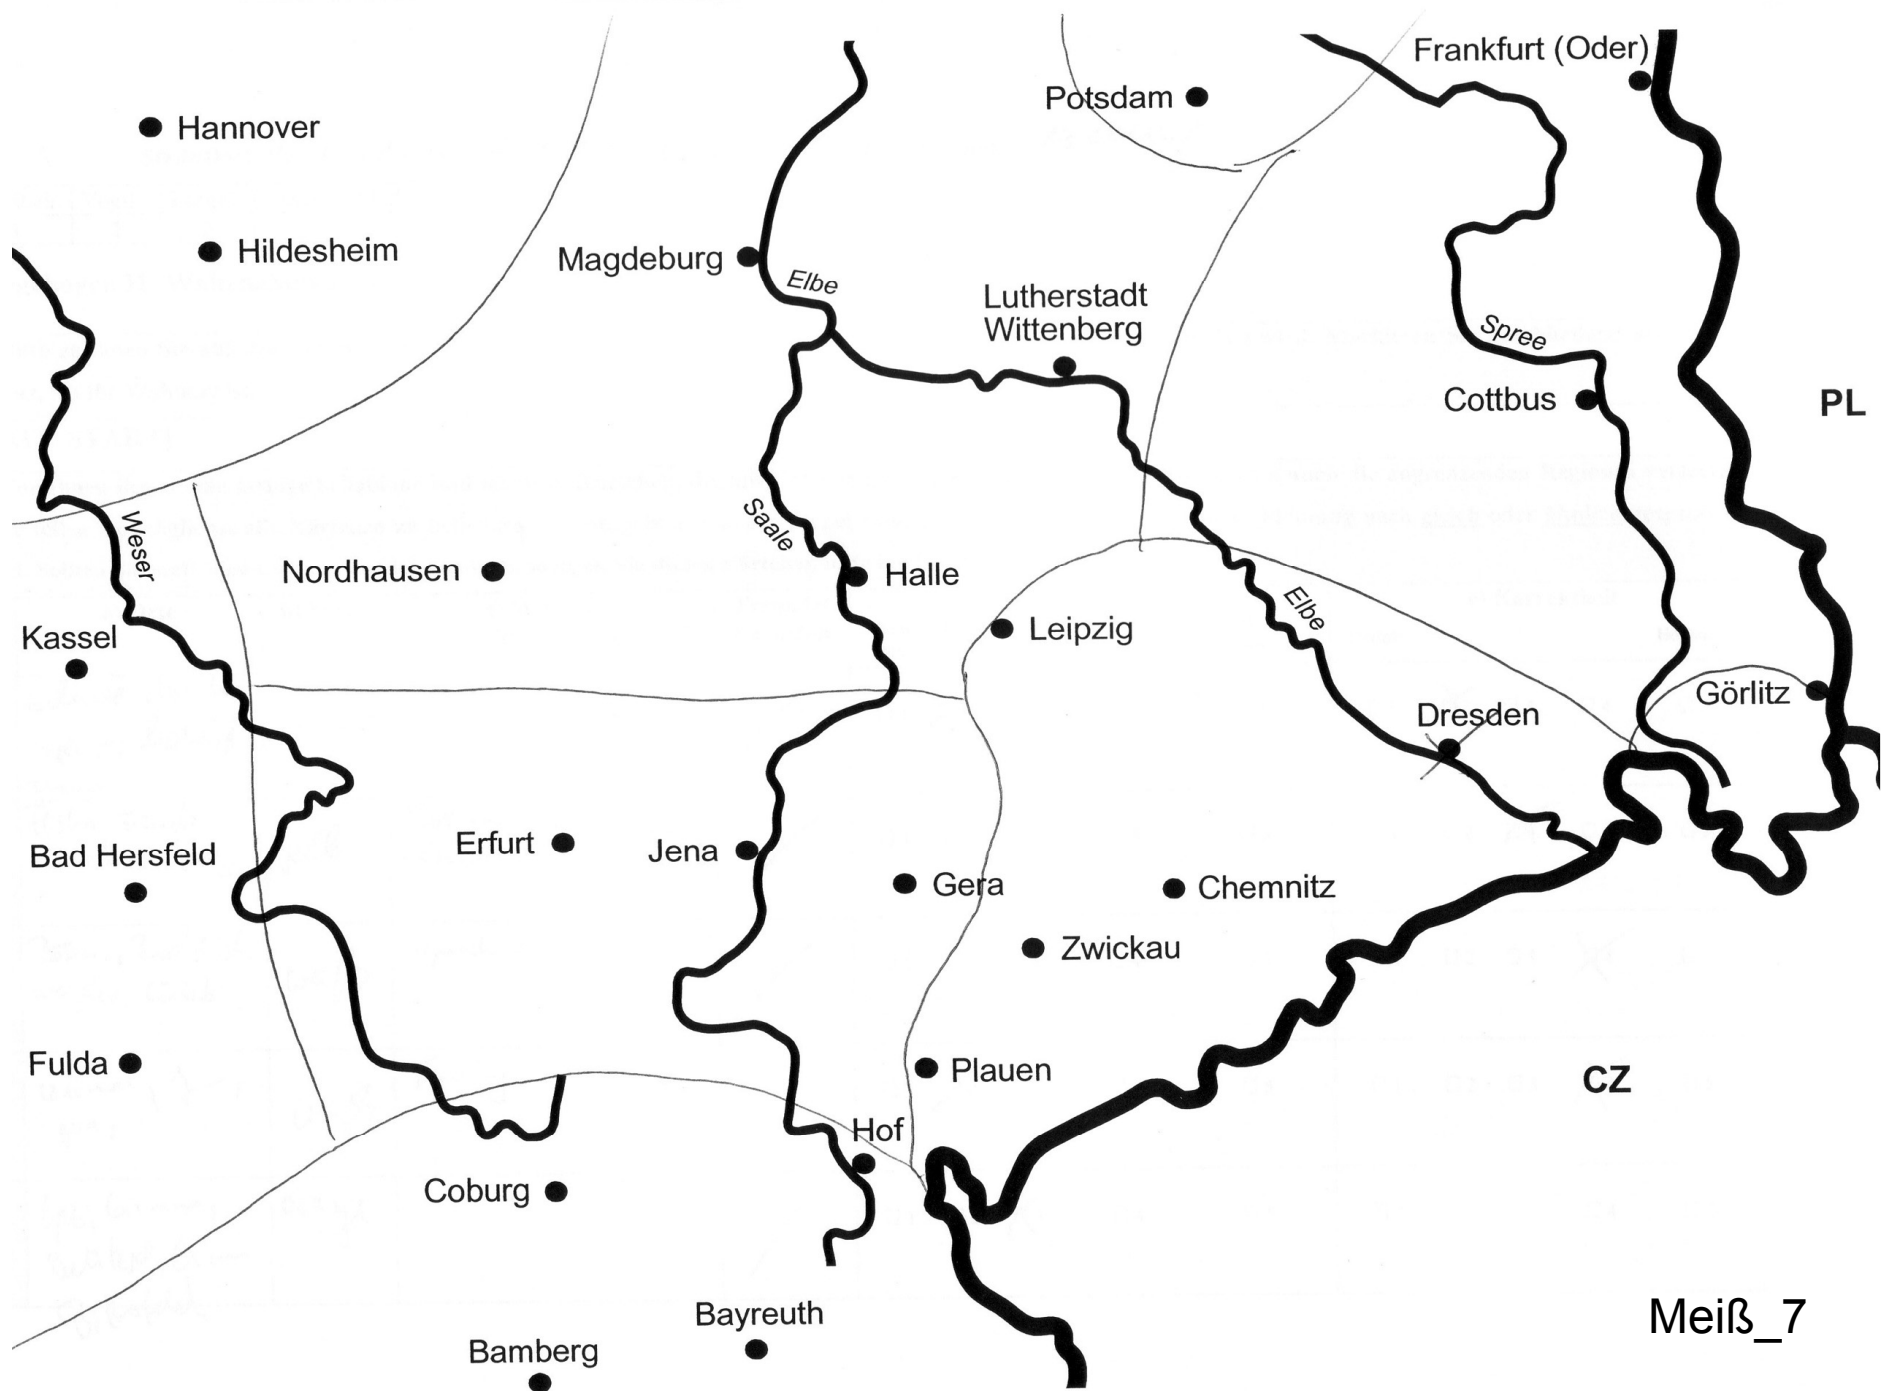

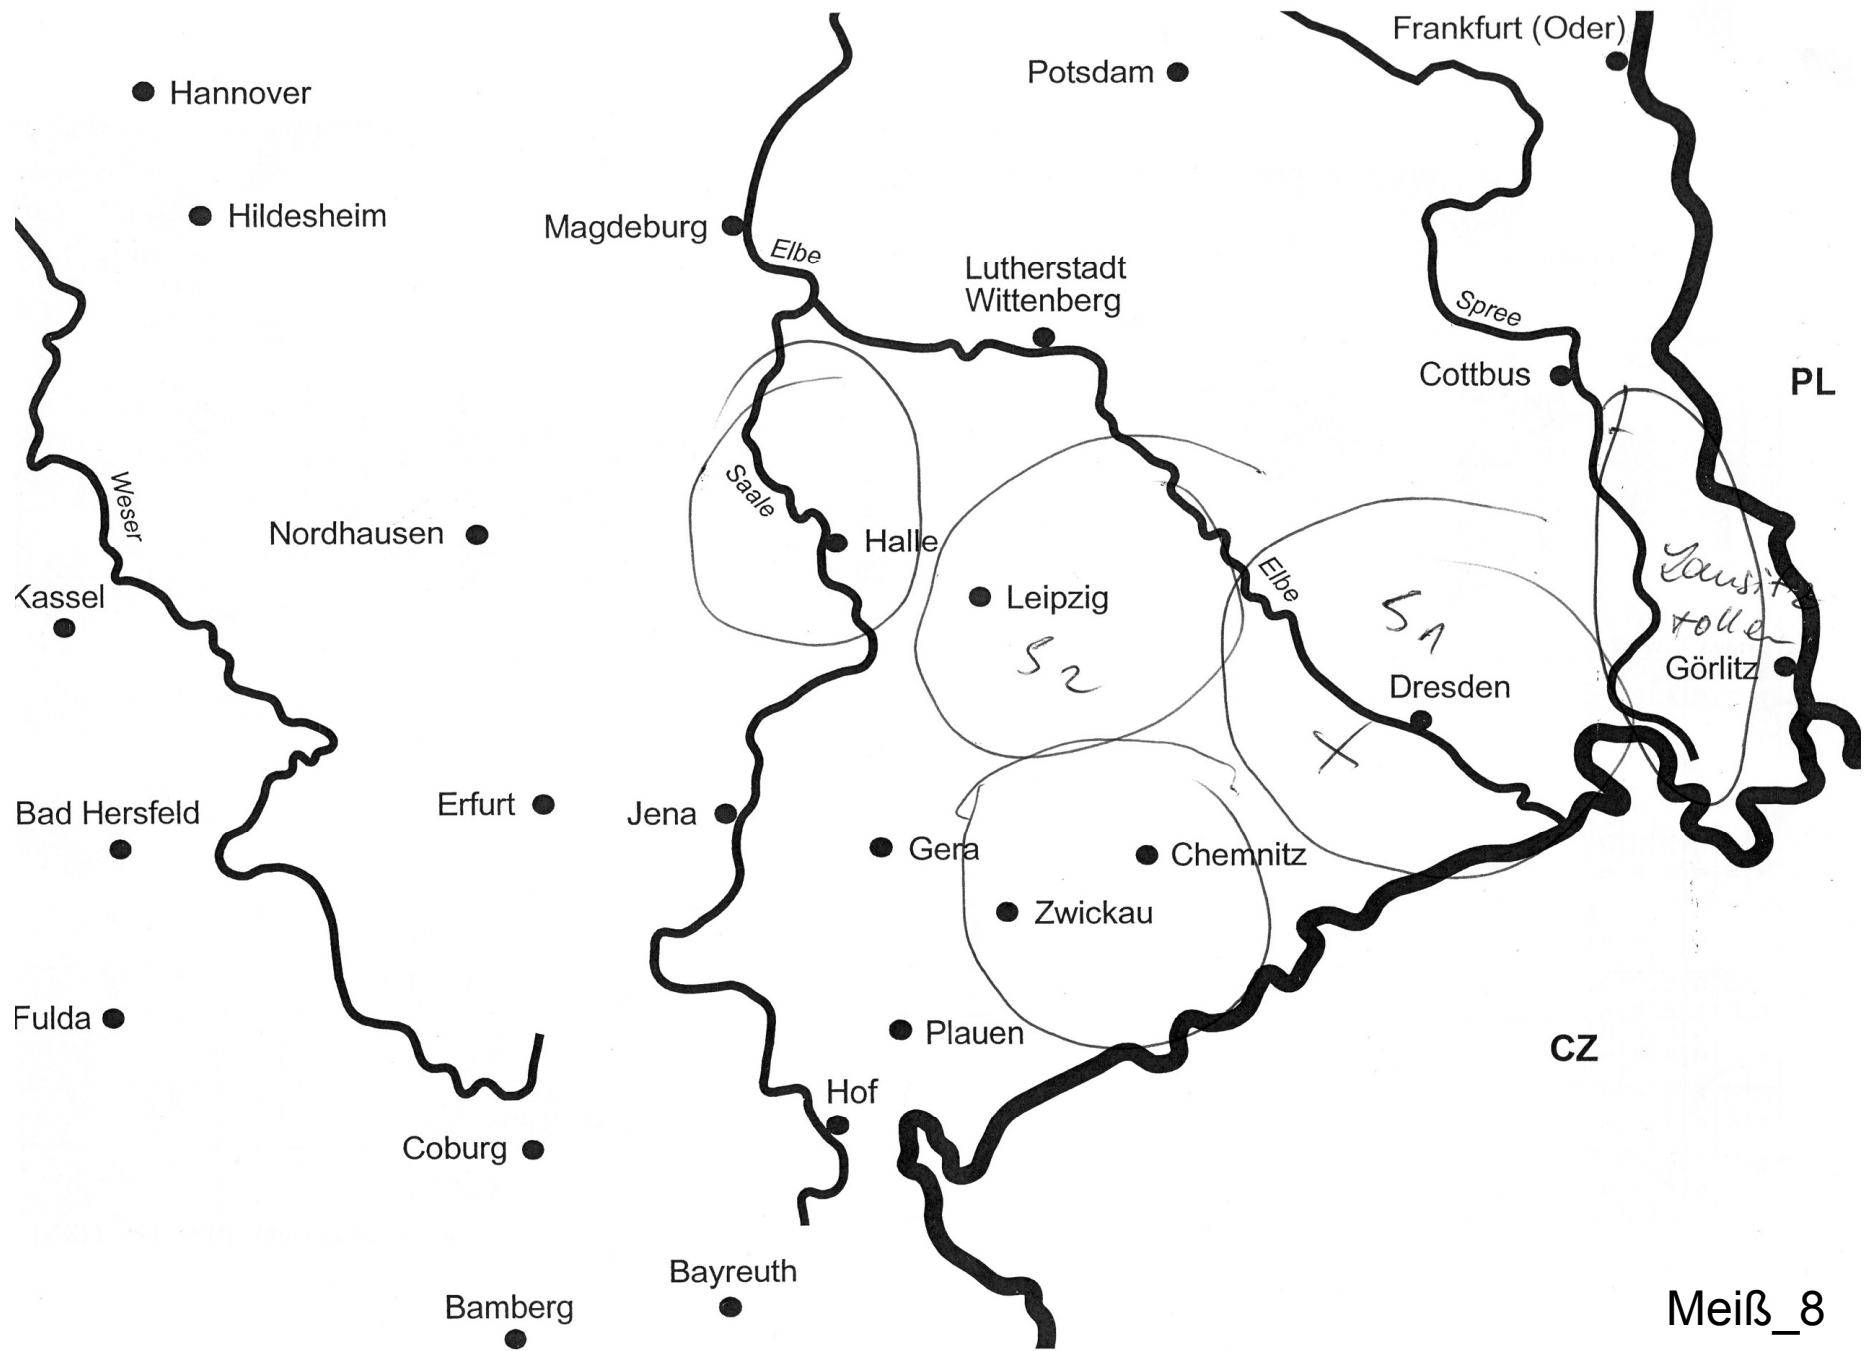

Meiß\_8

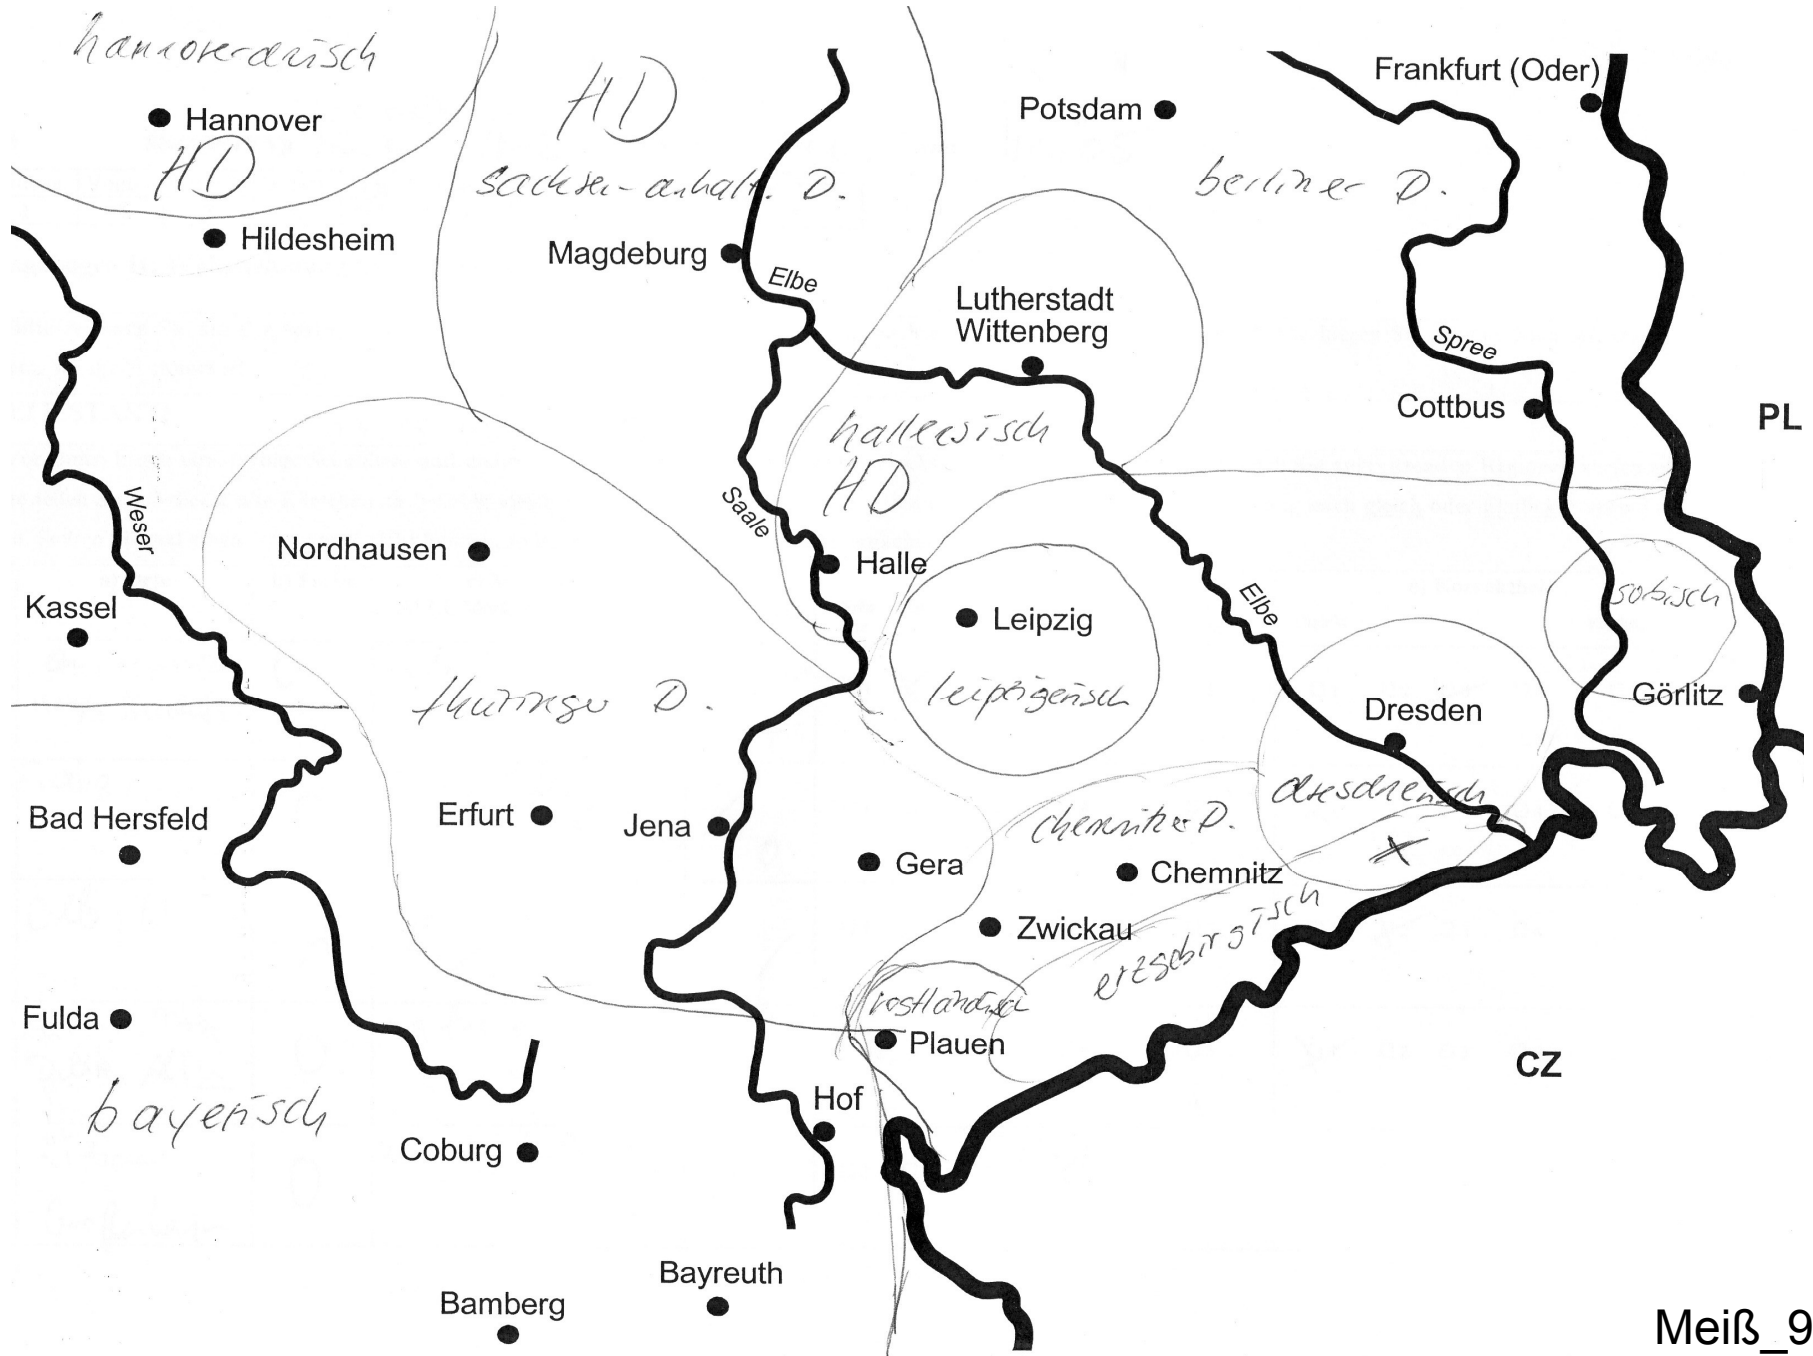

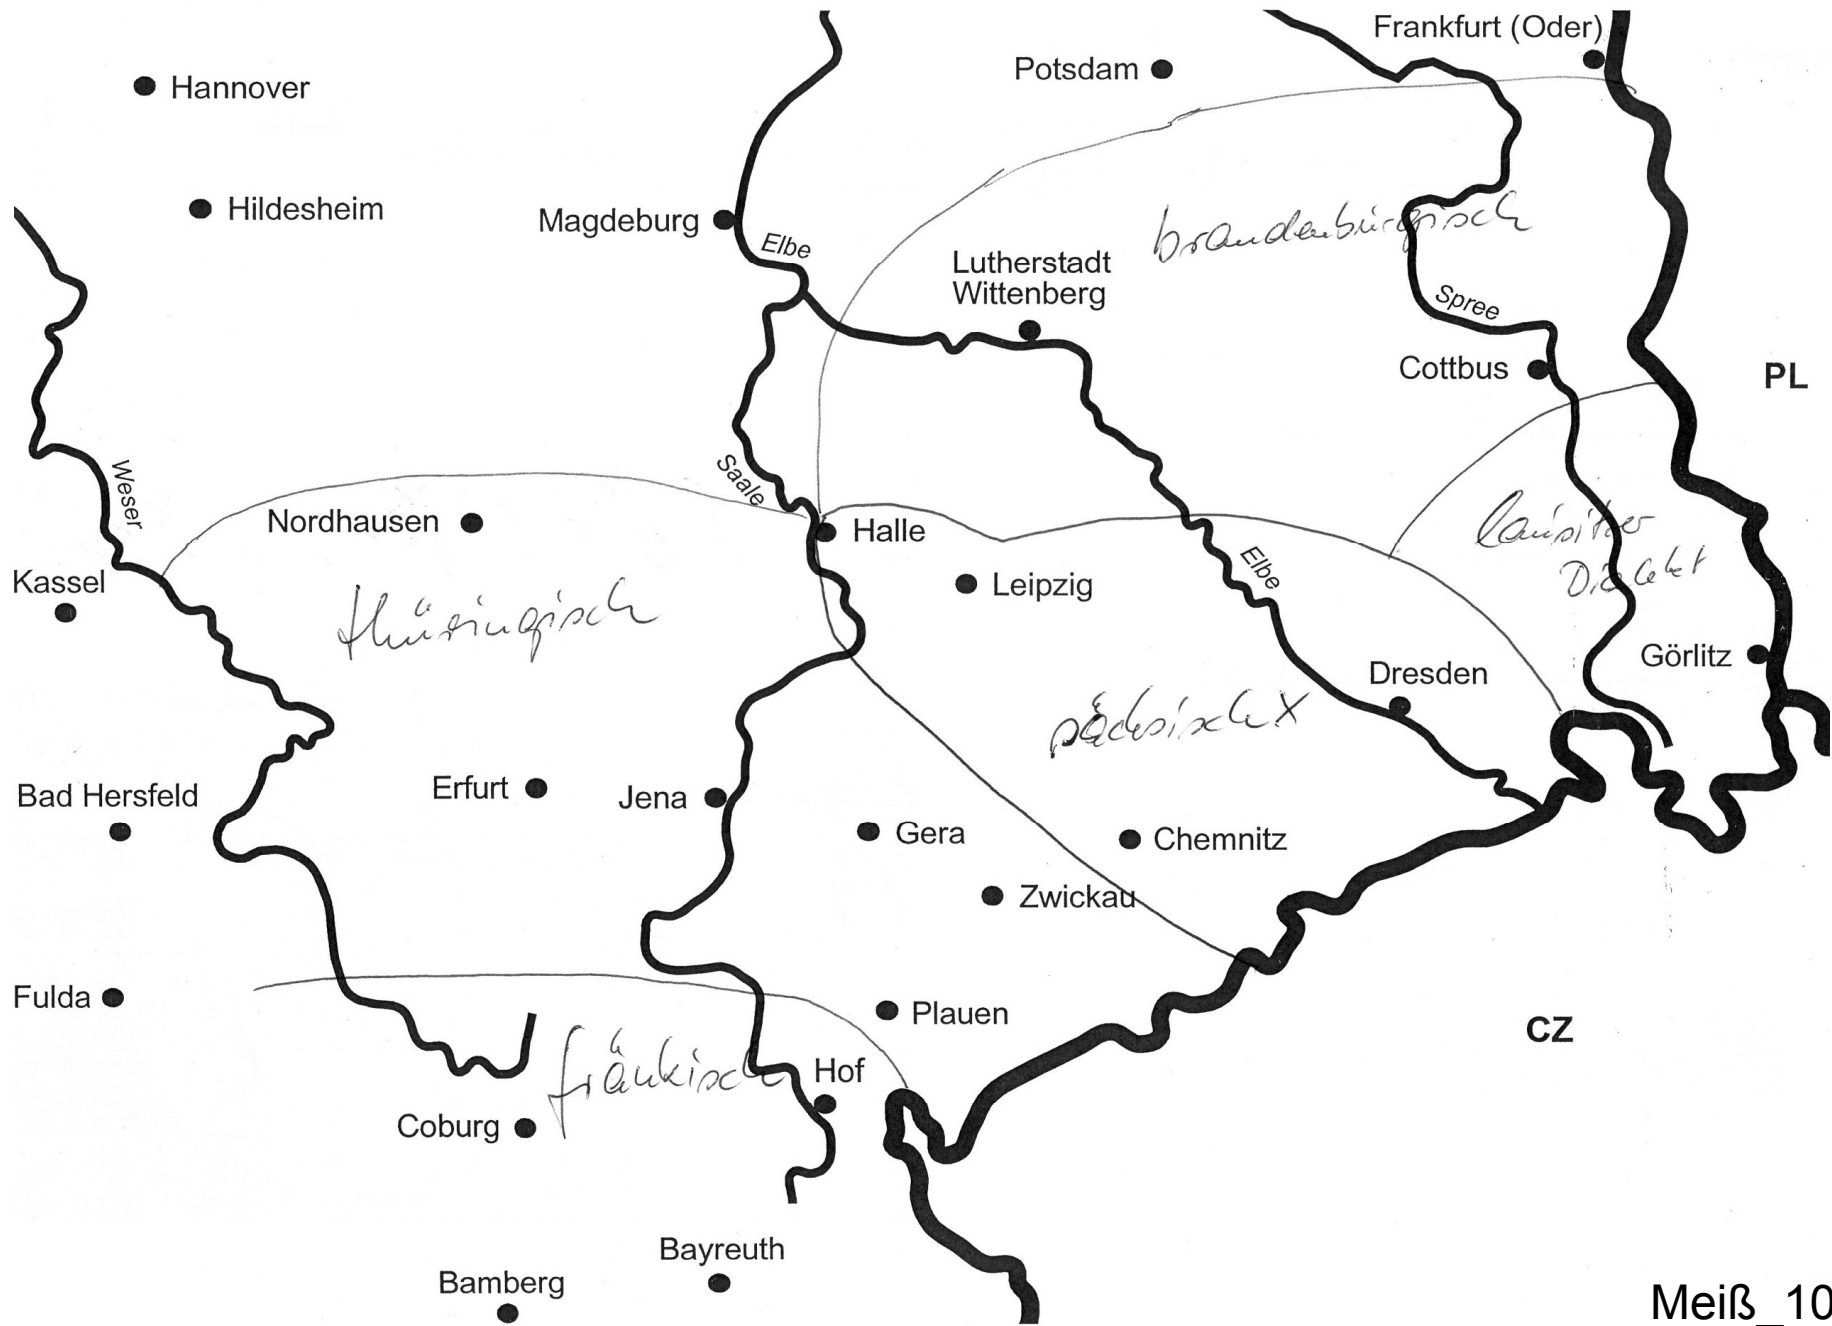



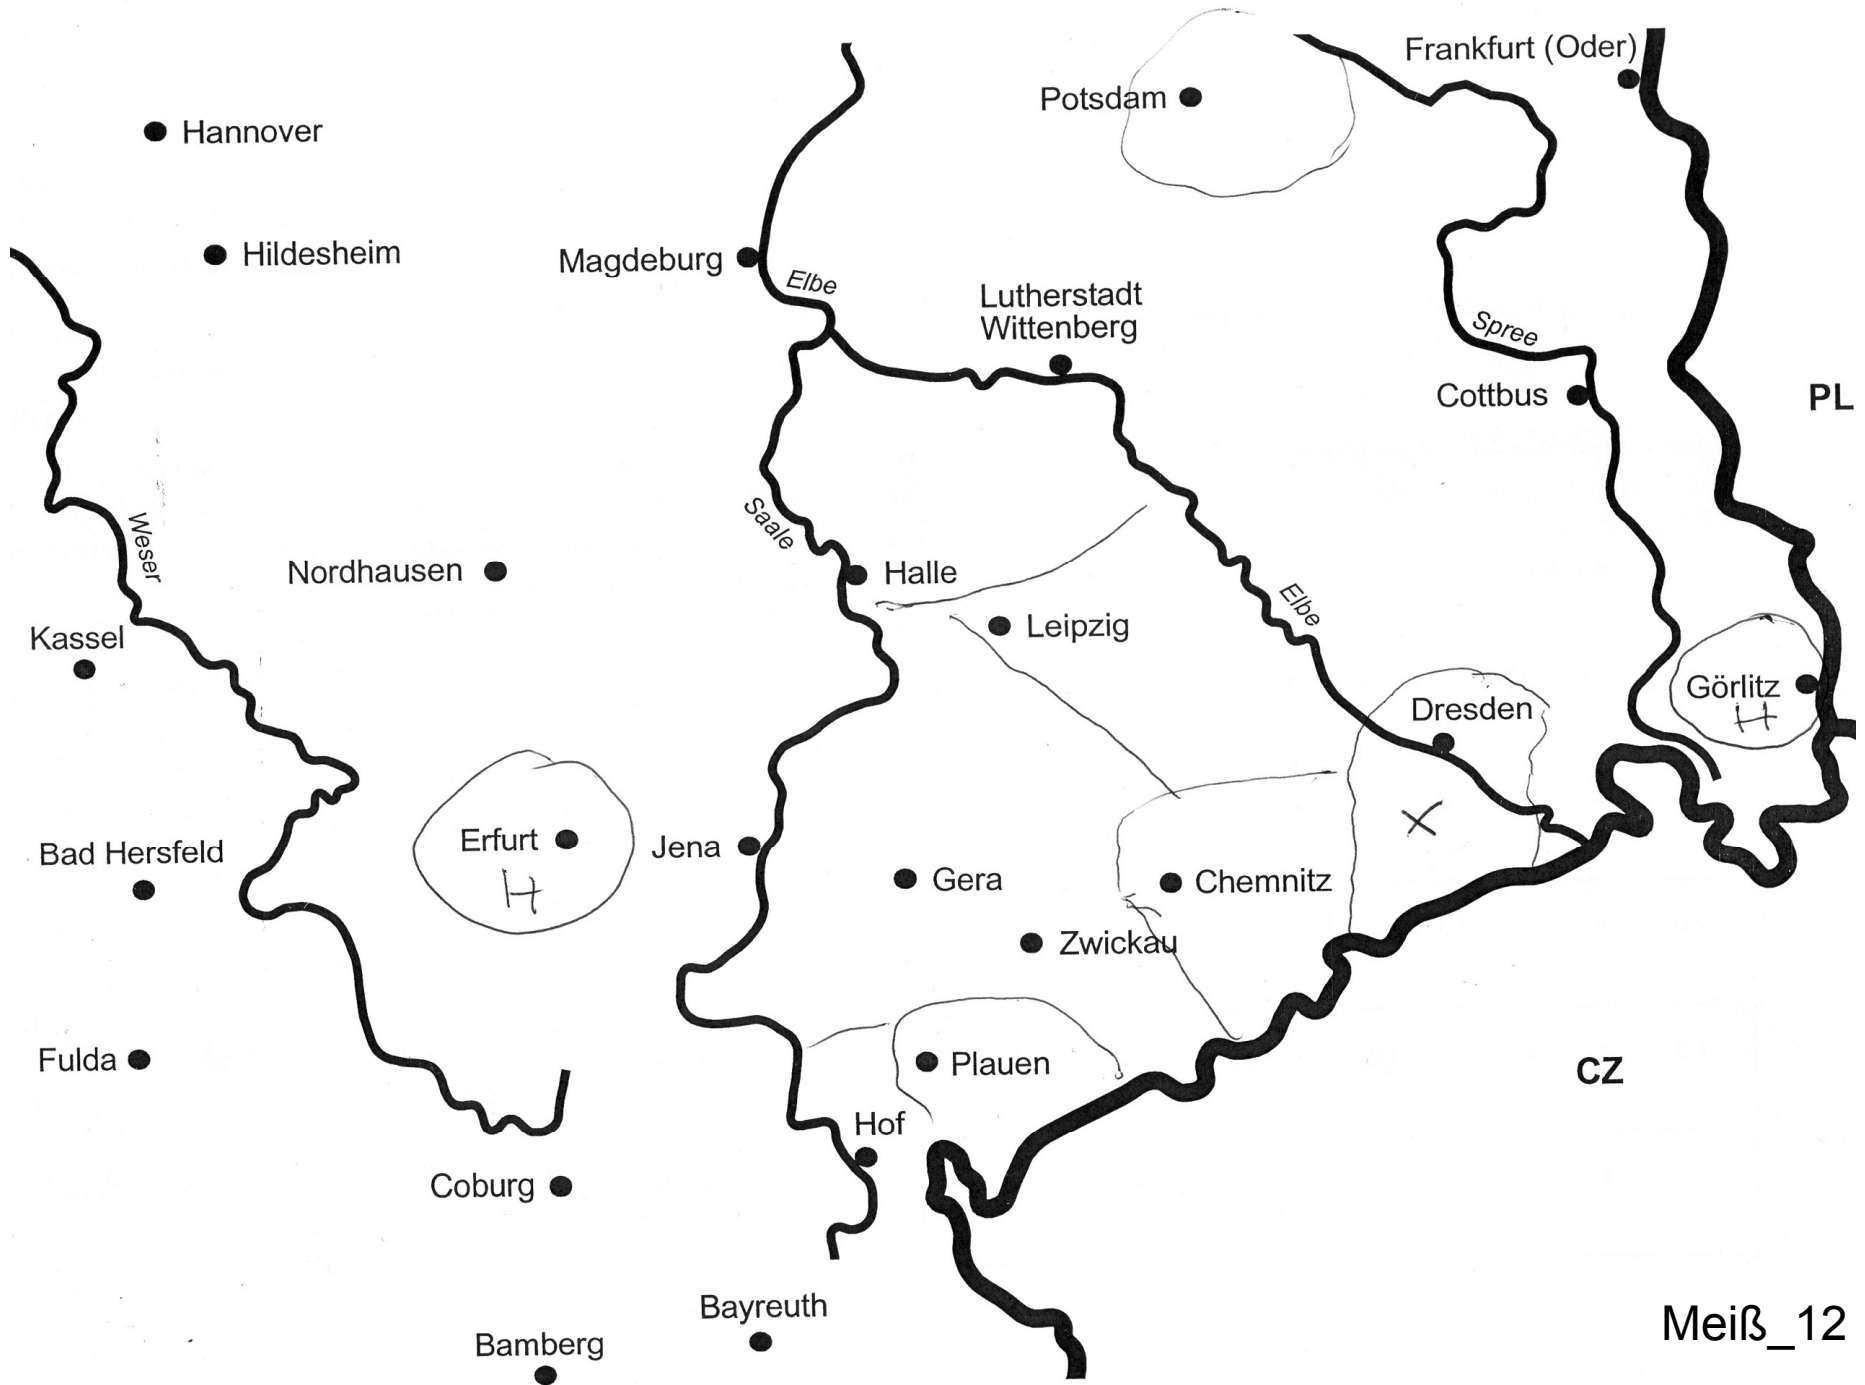

MeiB\_12



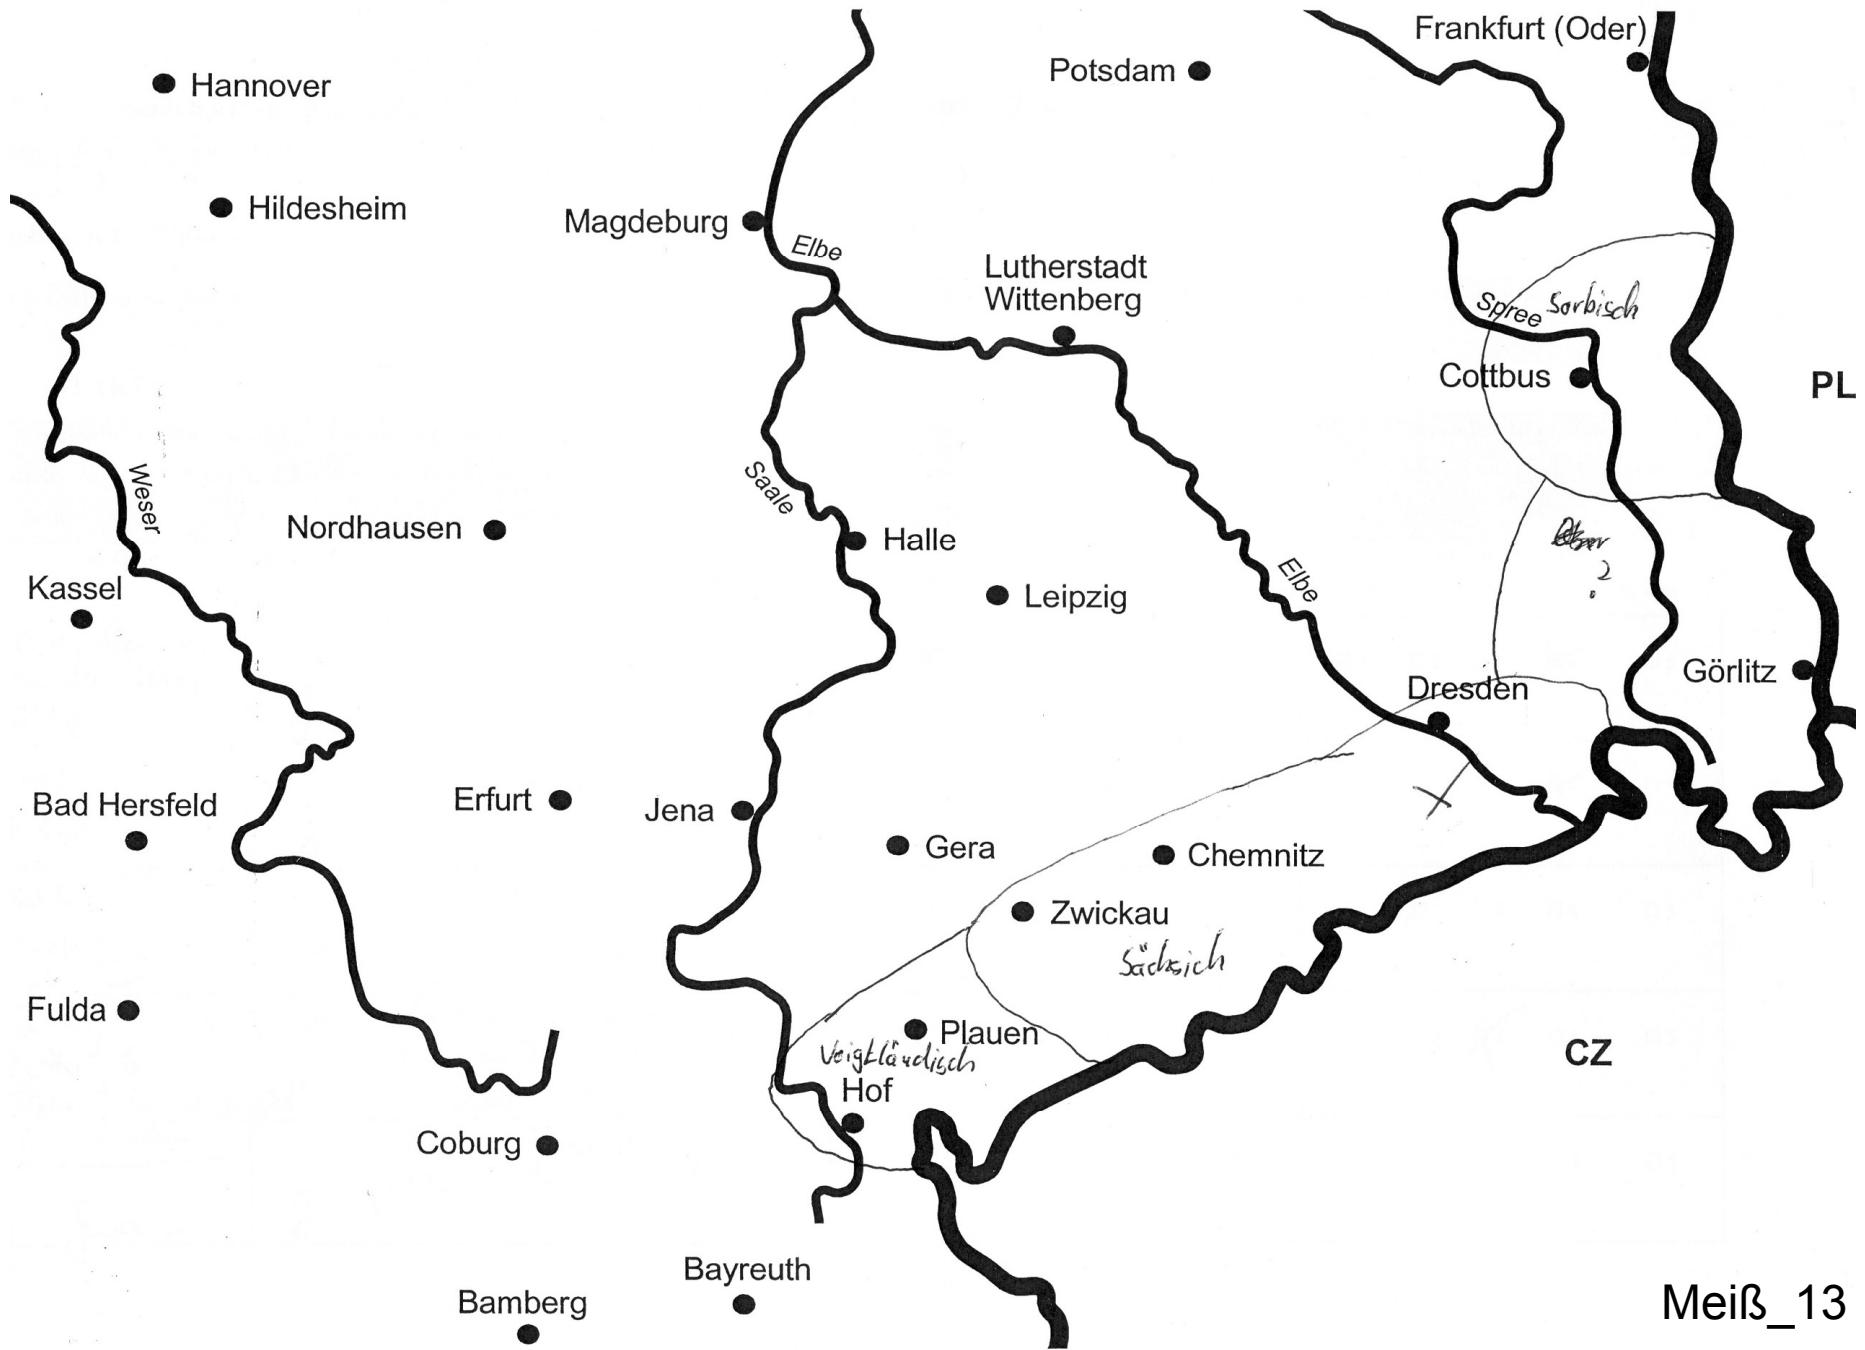

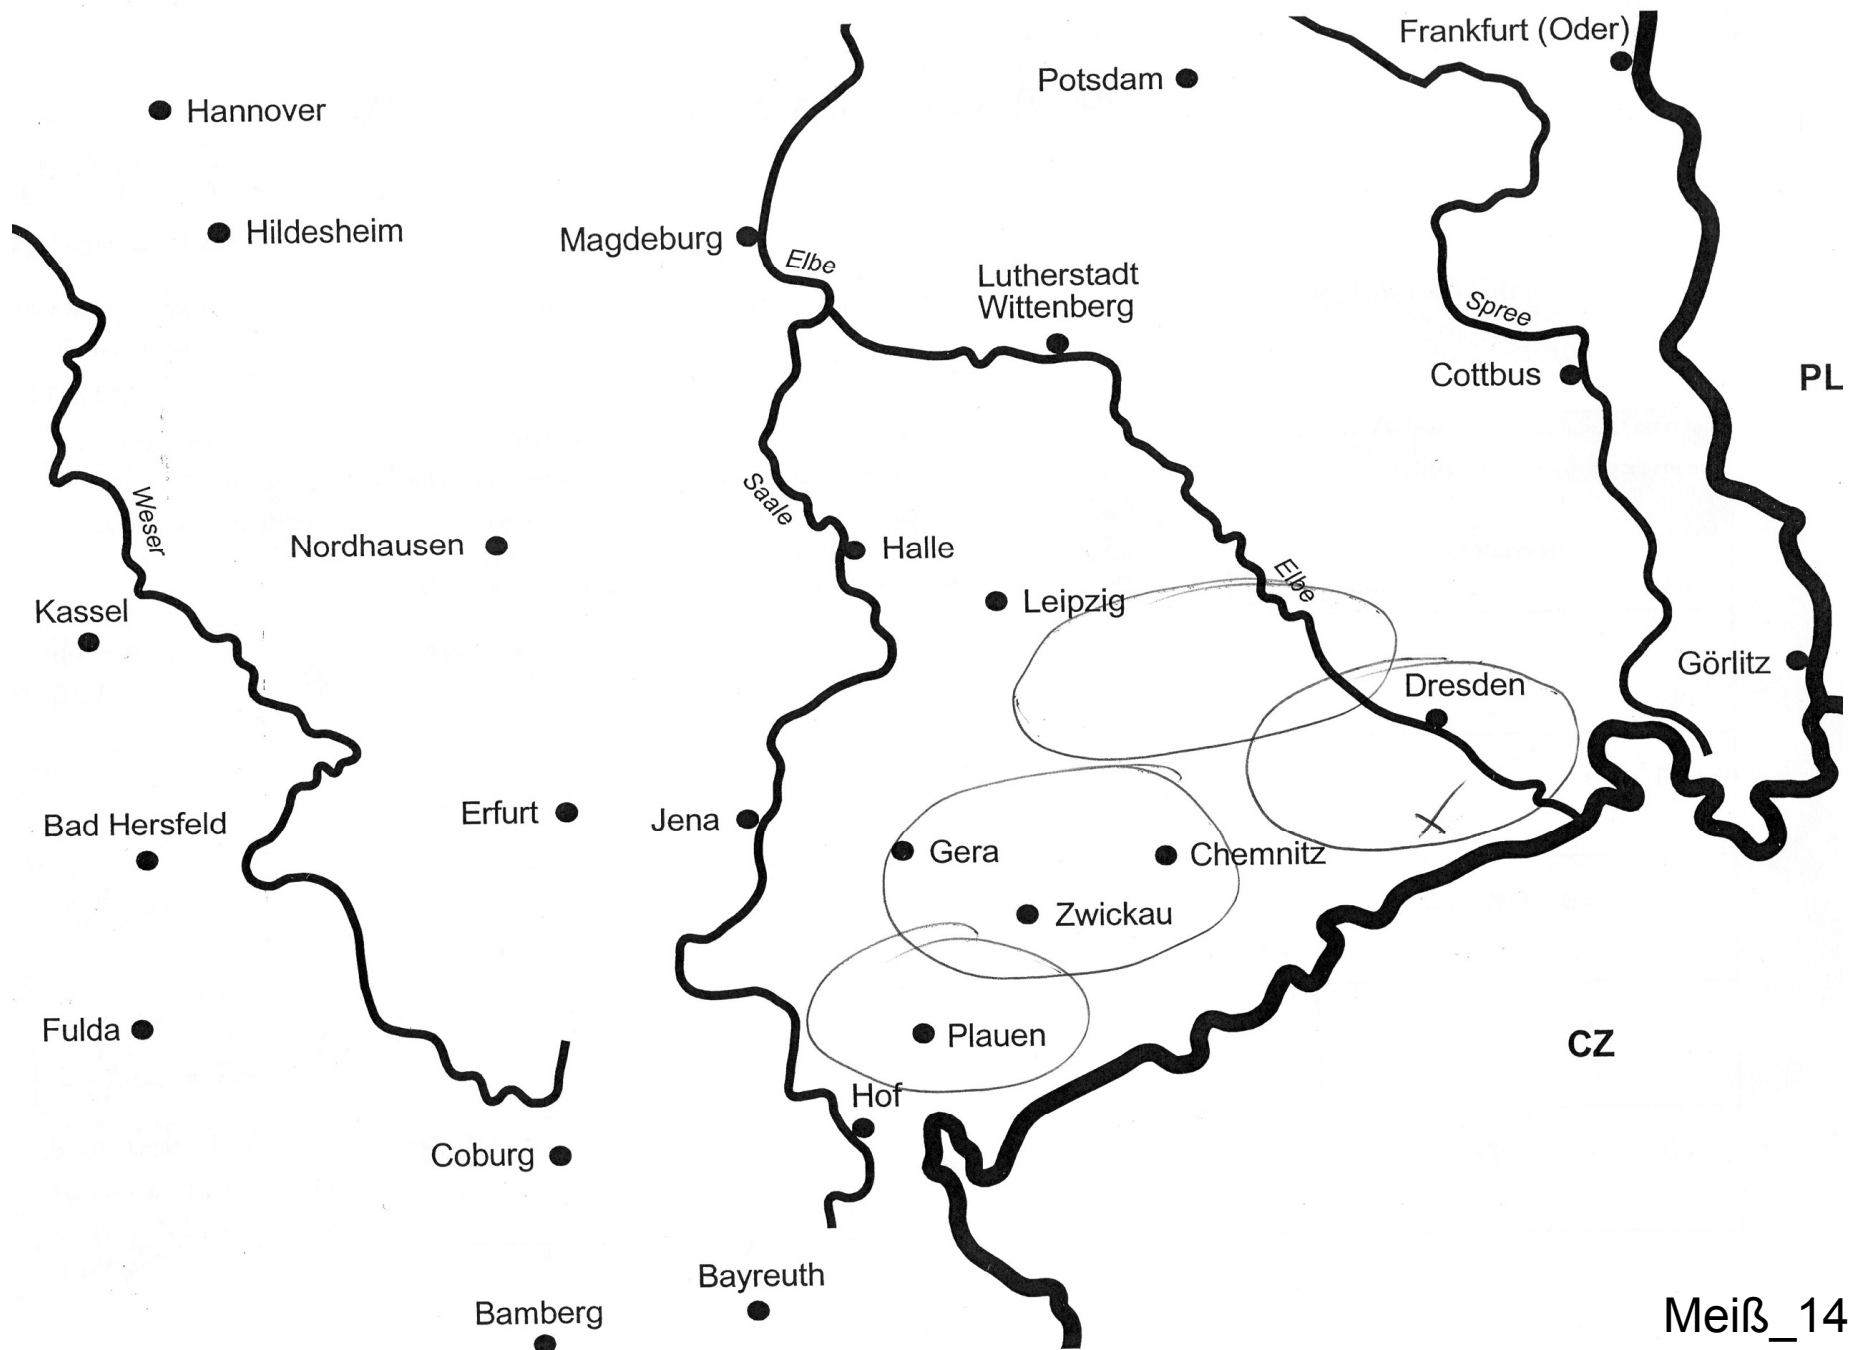

MeiB\_14

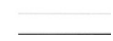

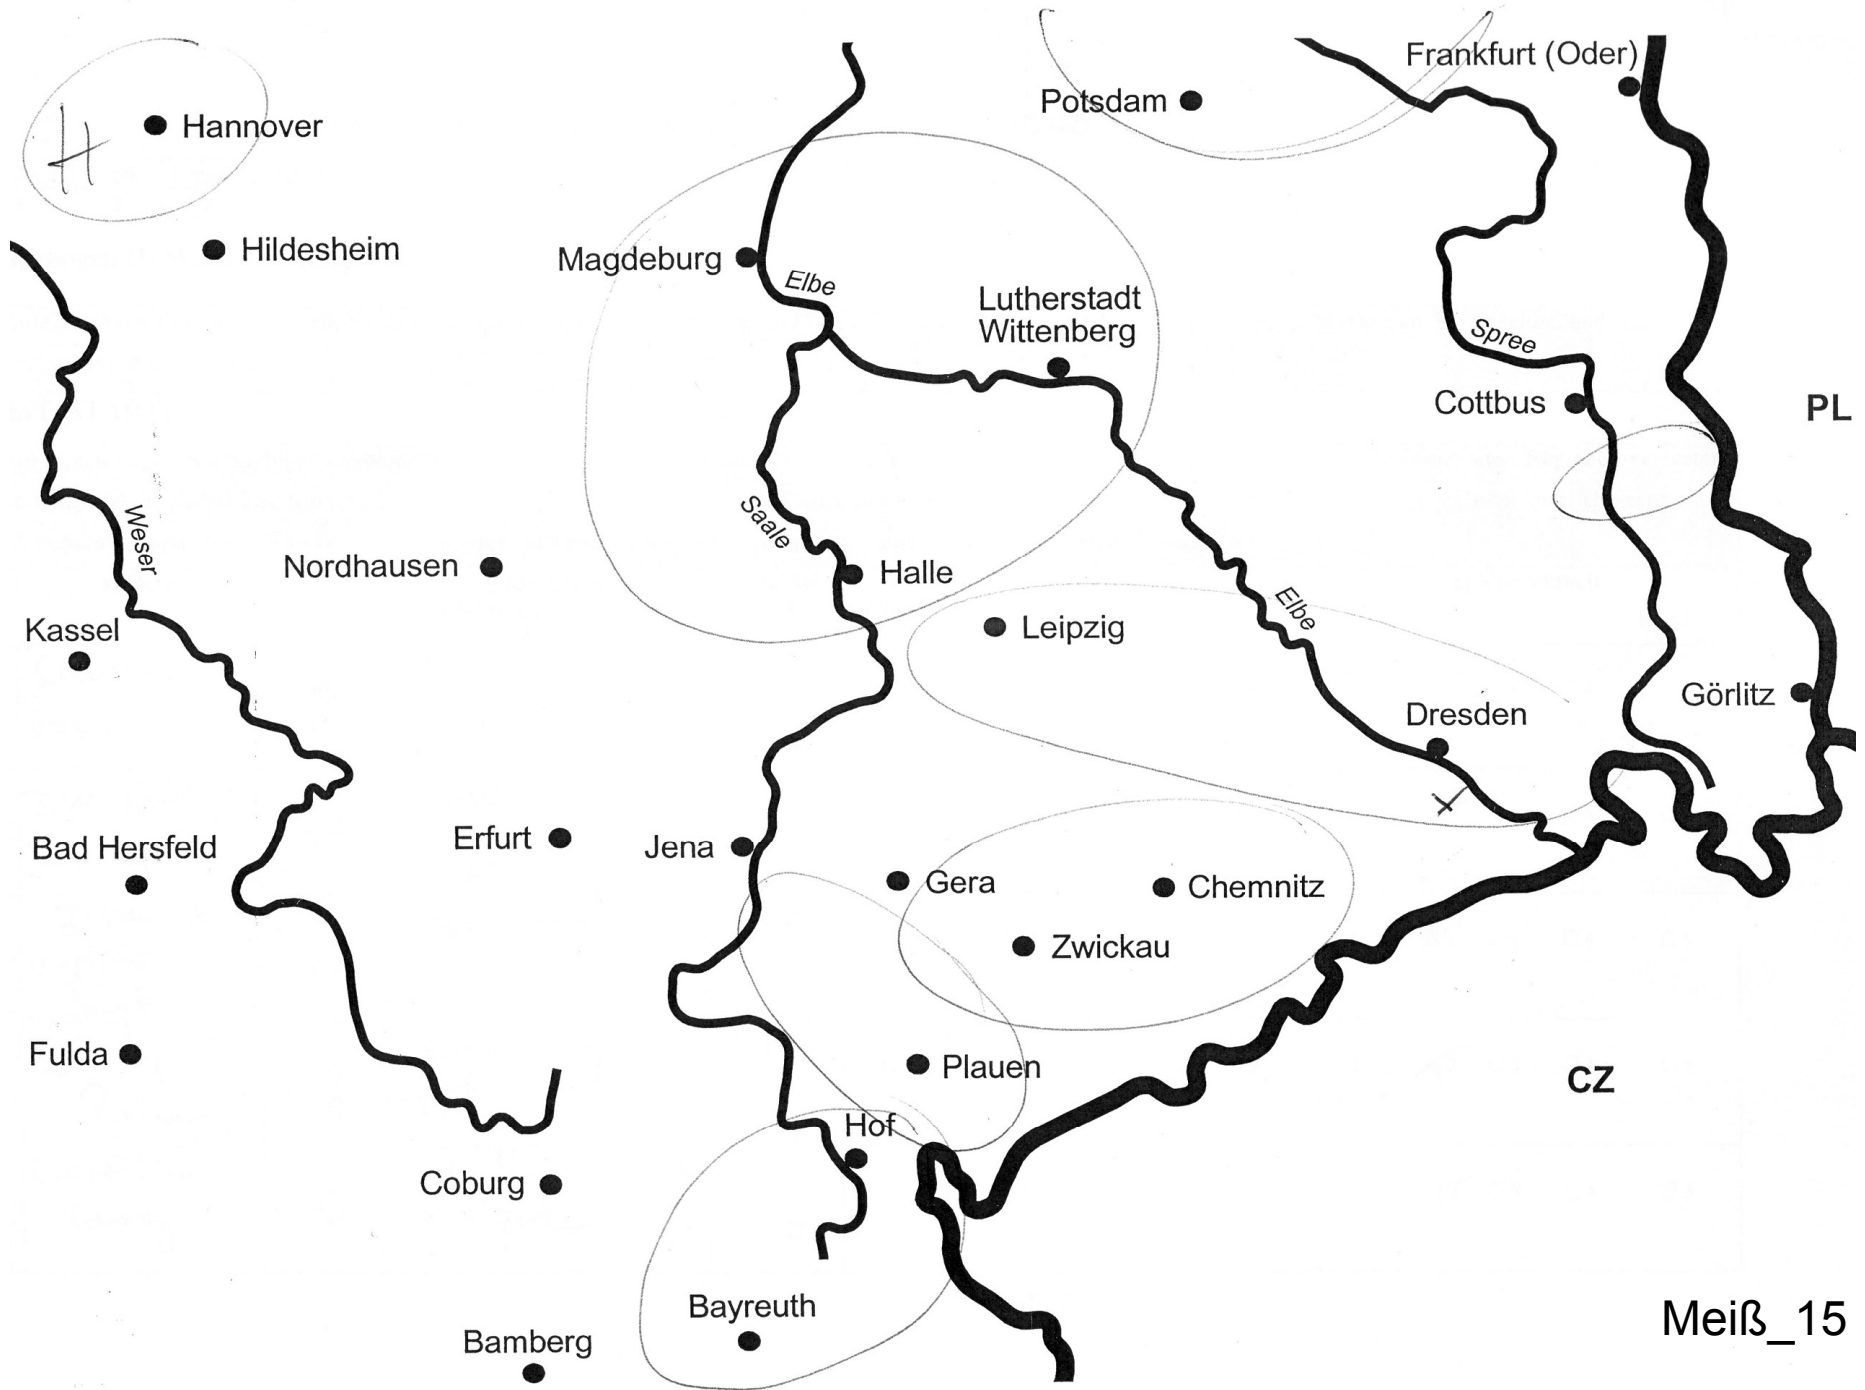

MeiB\_15

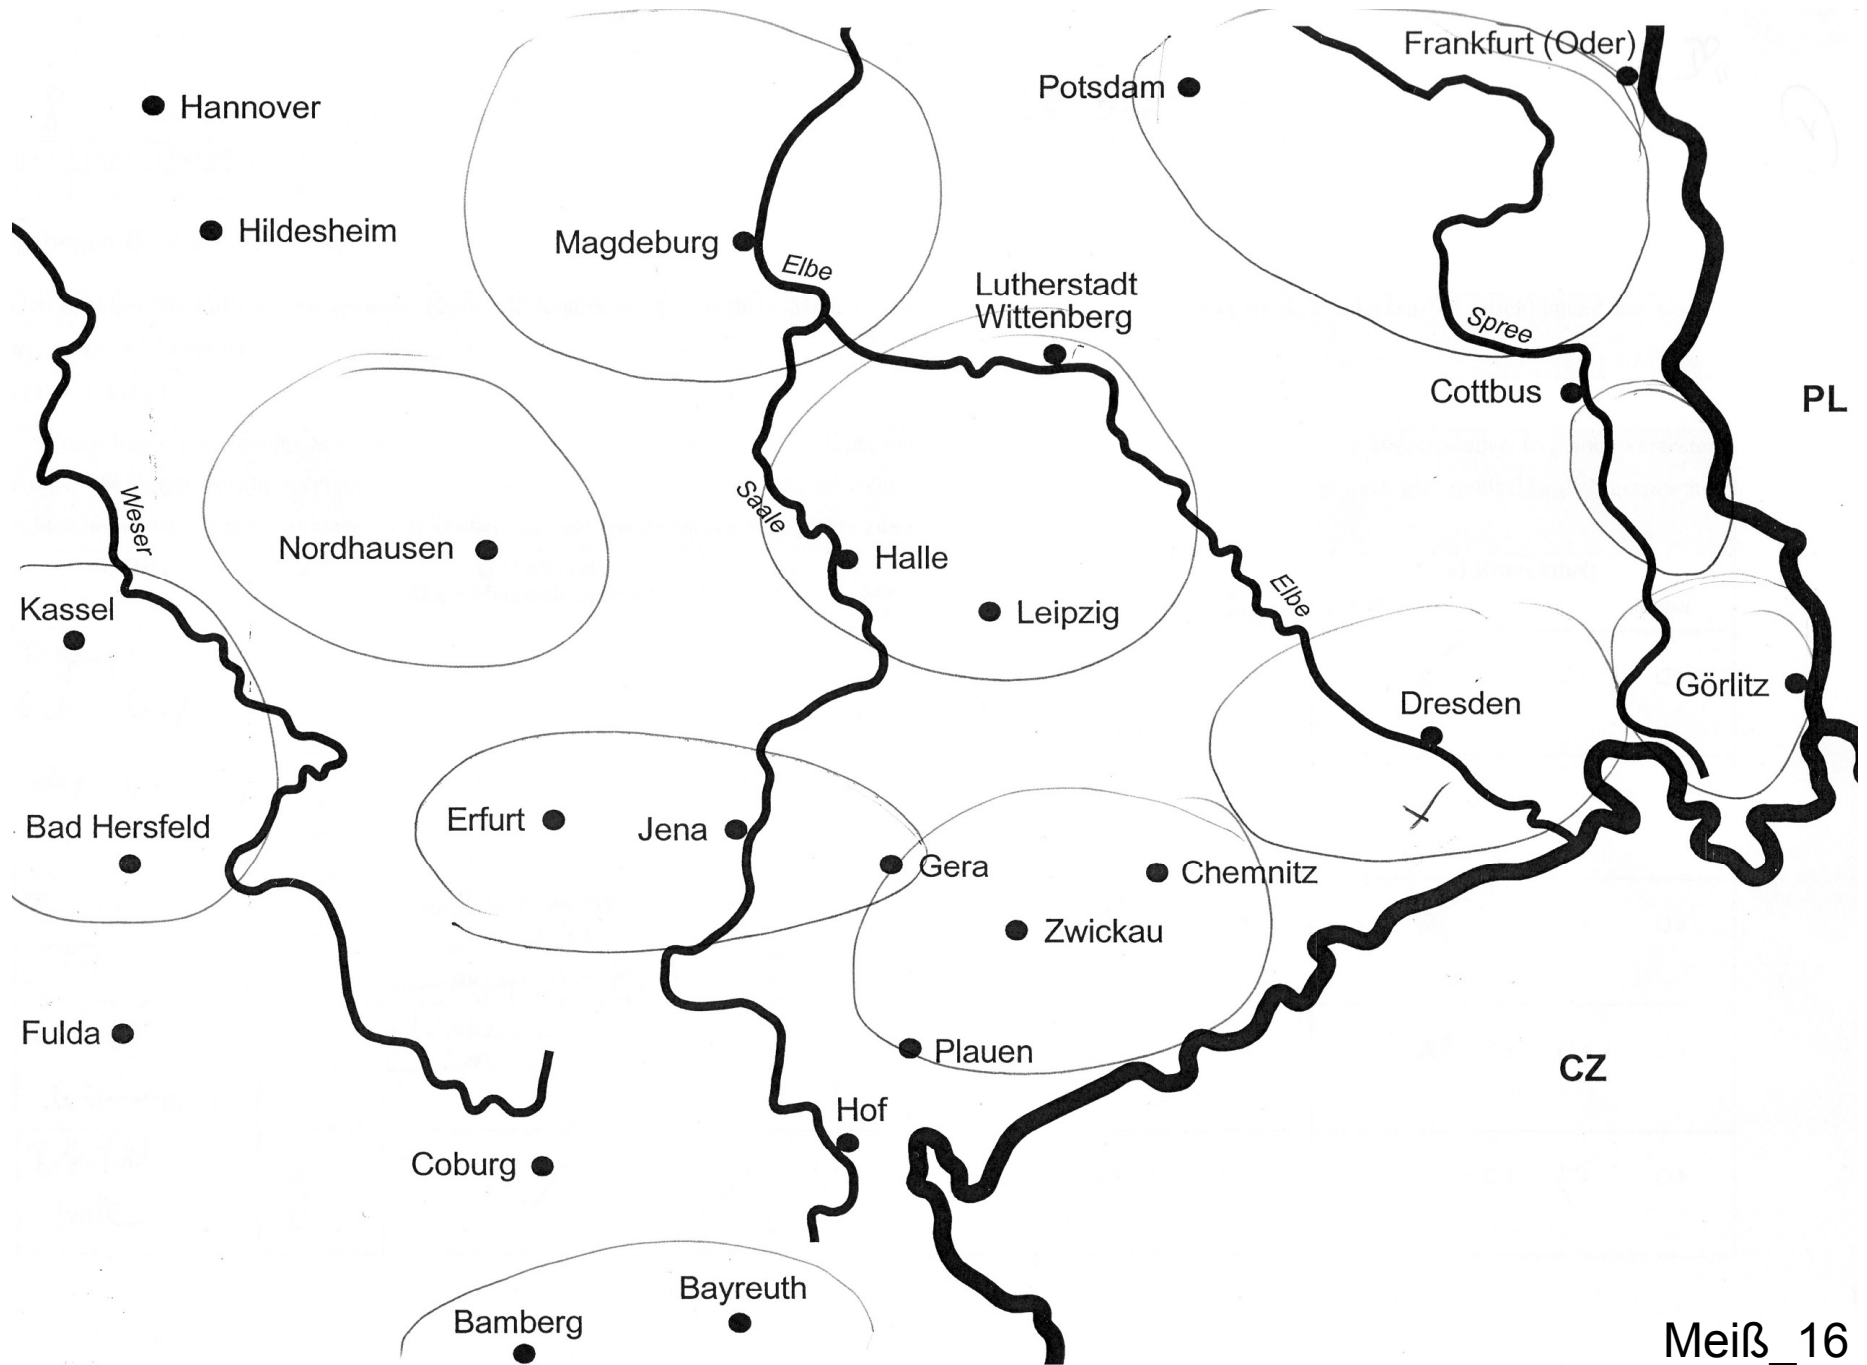

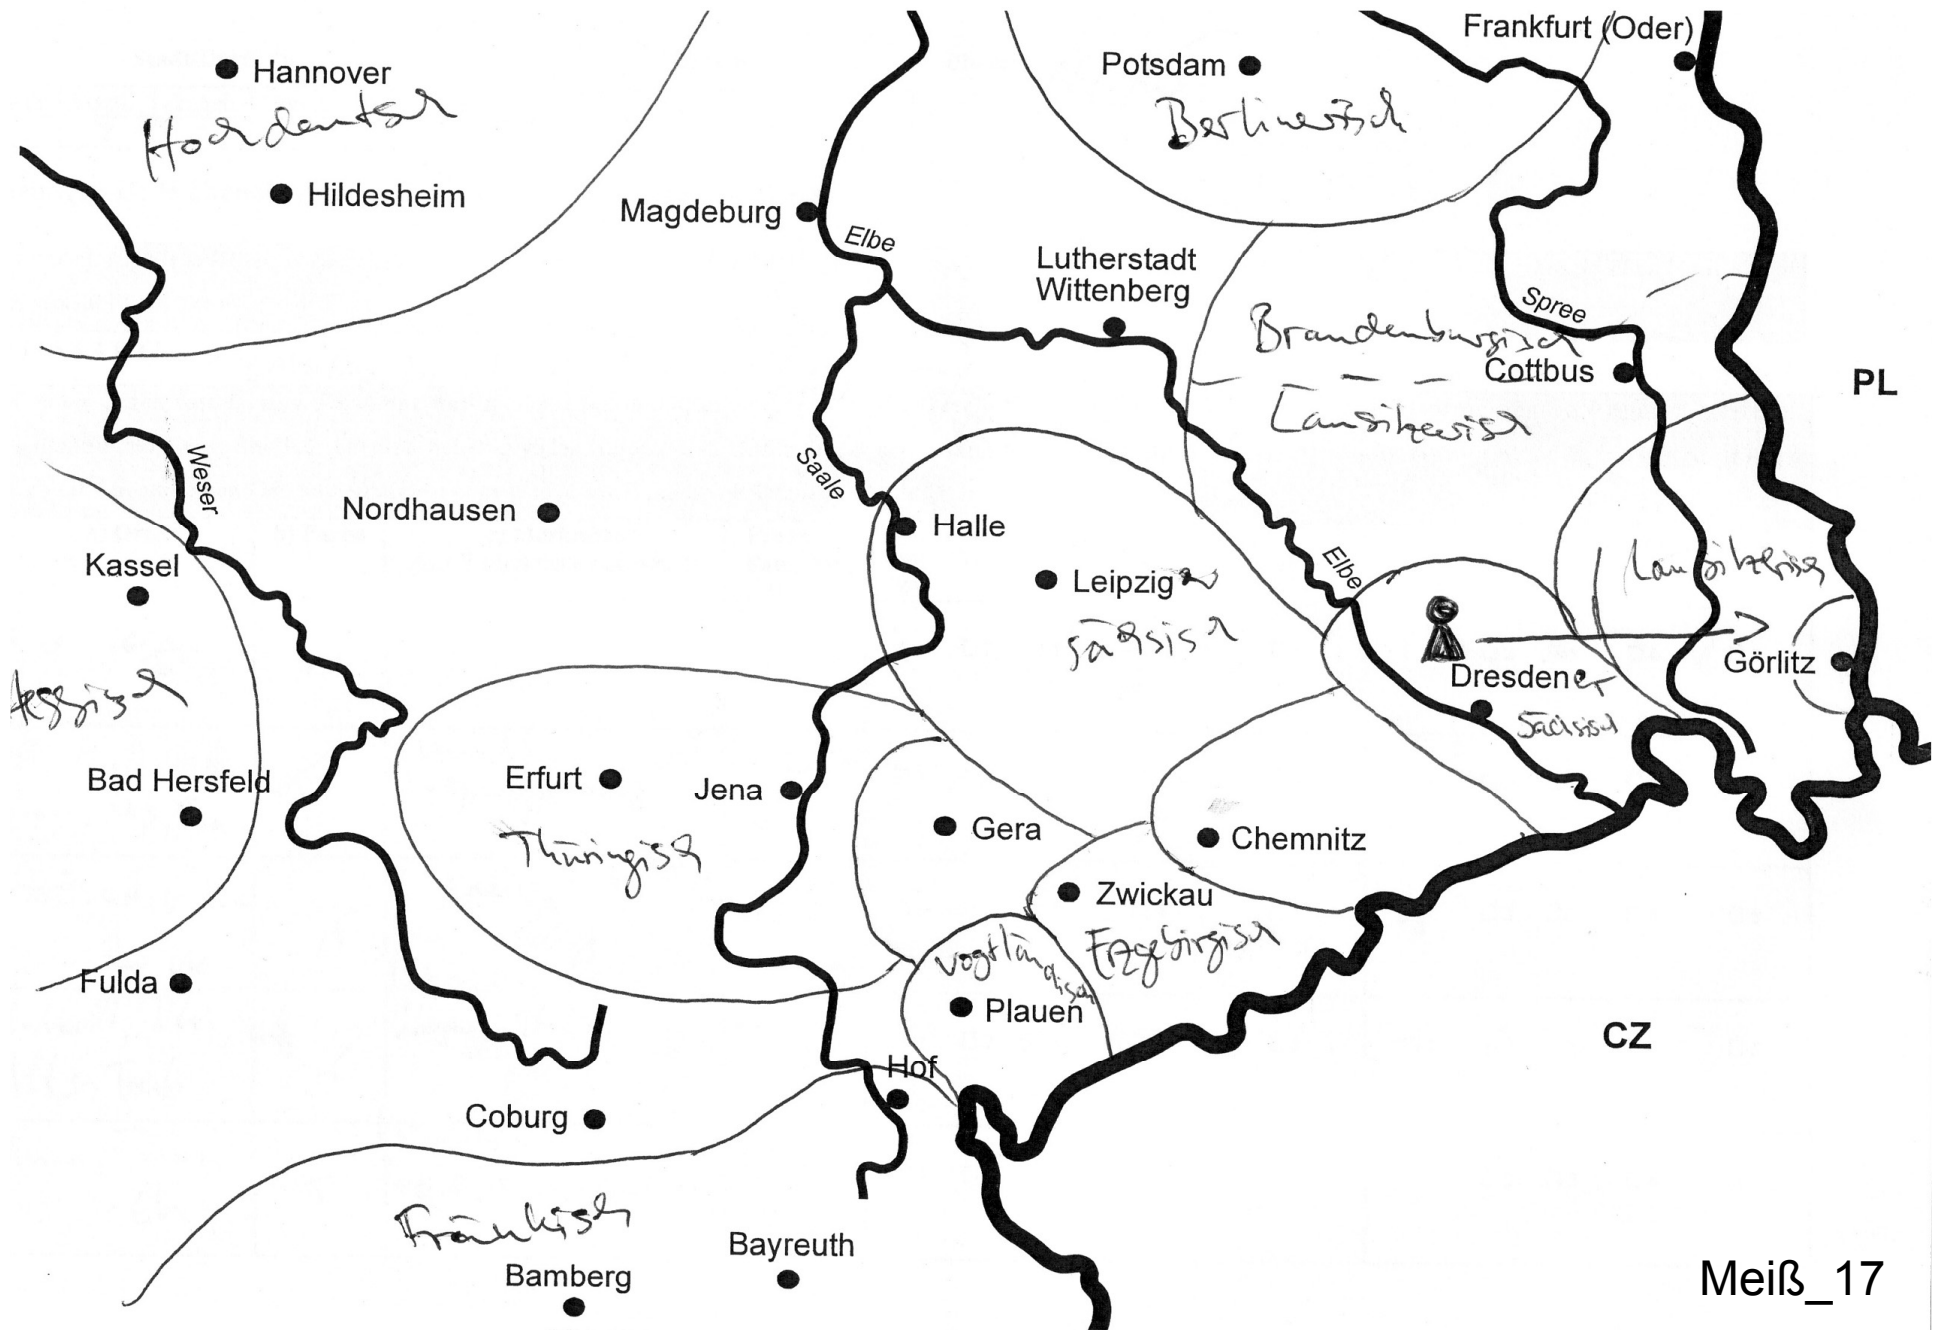

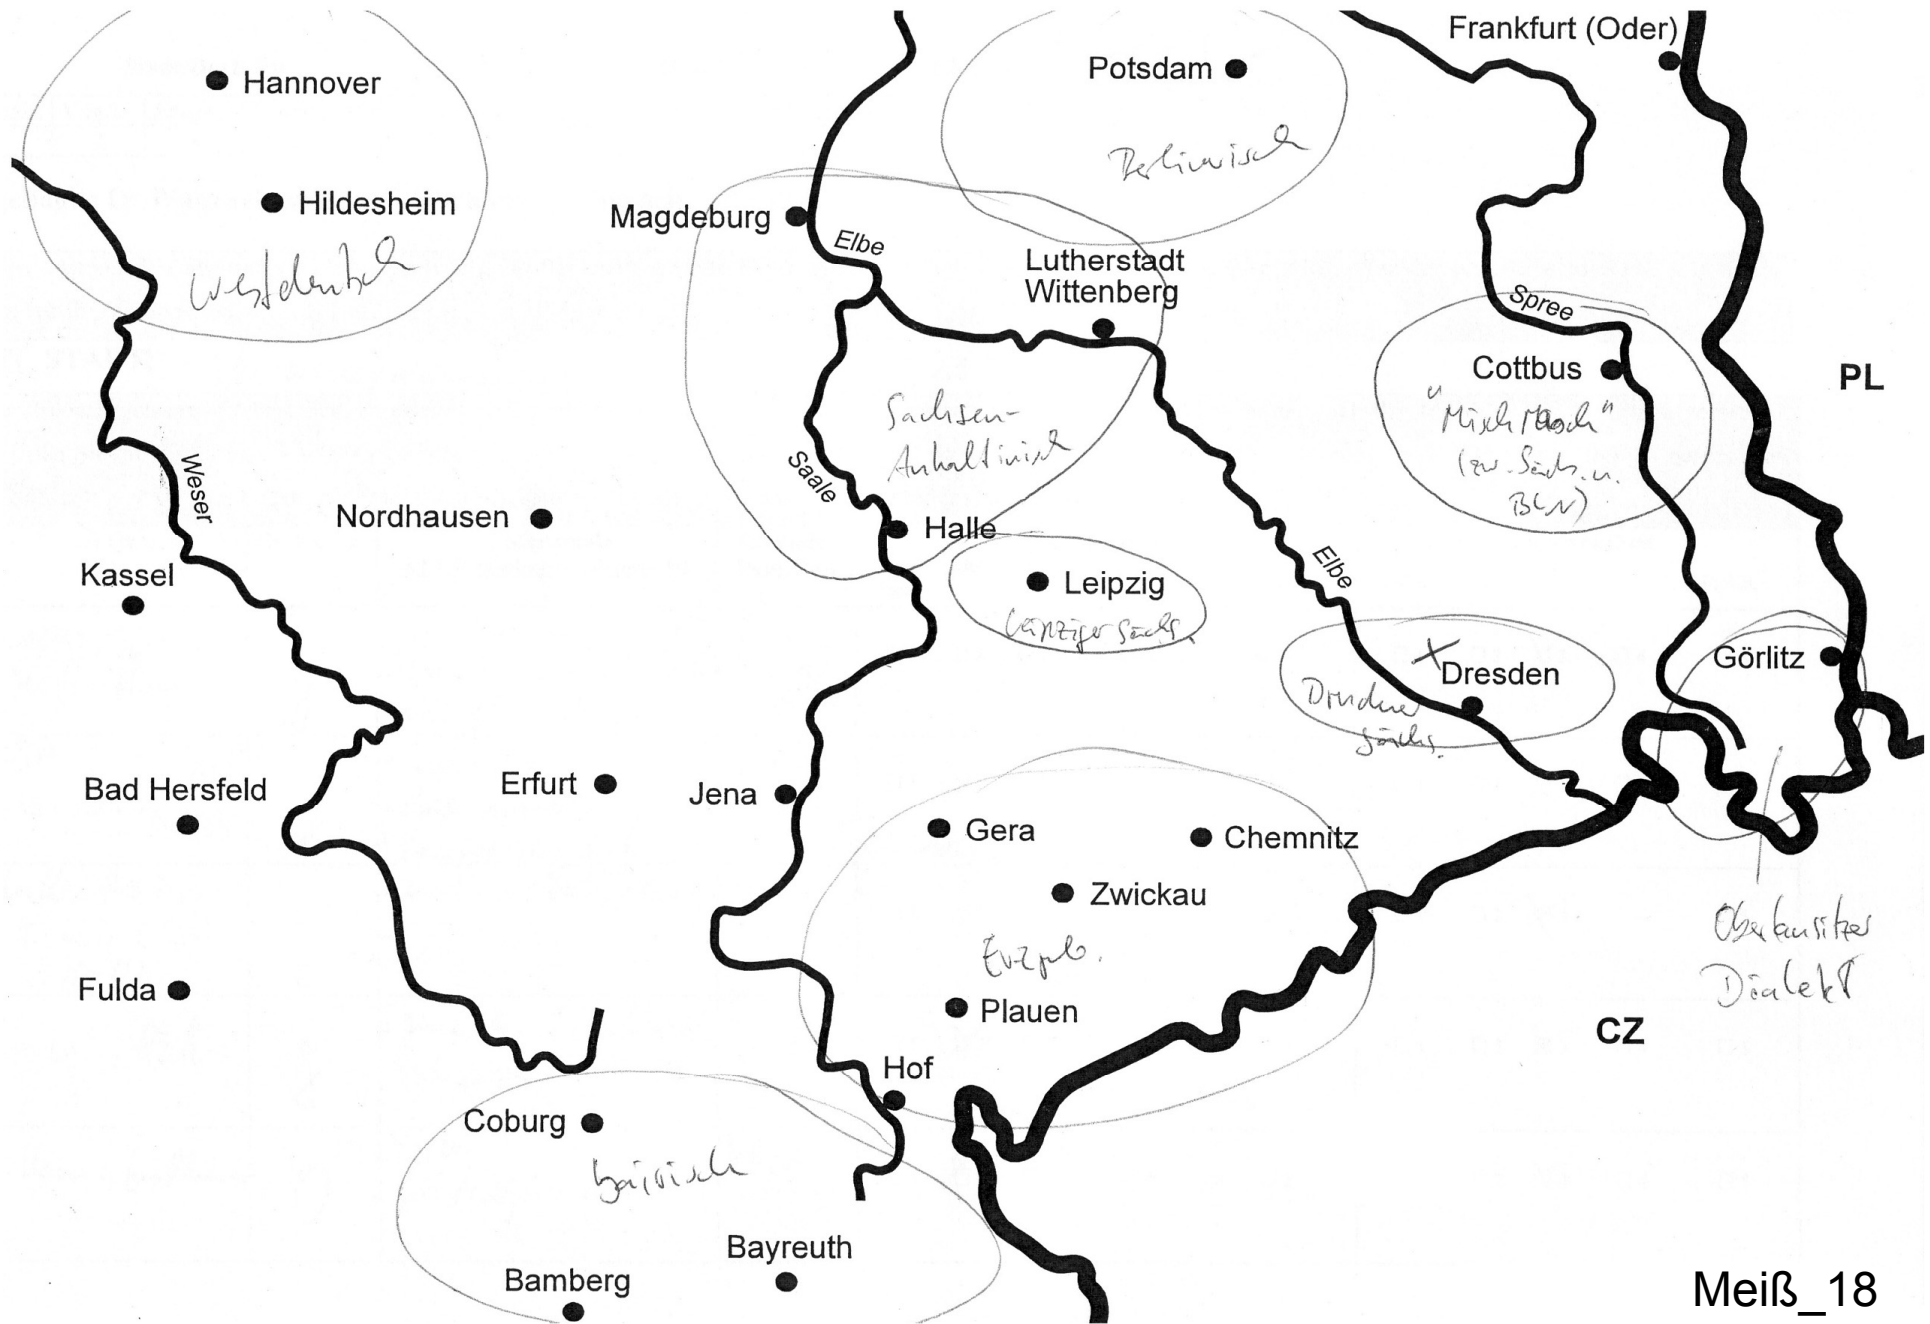

Meiß\_18

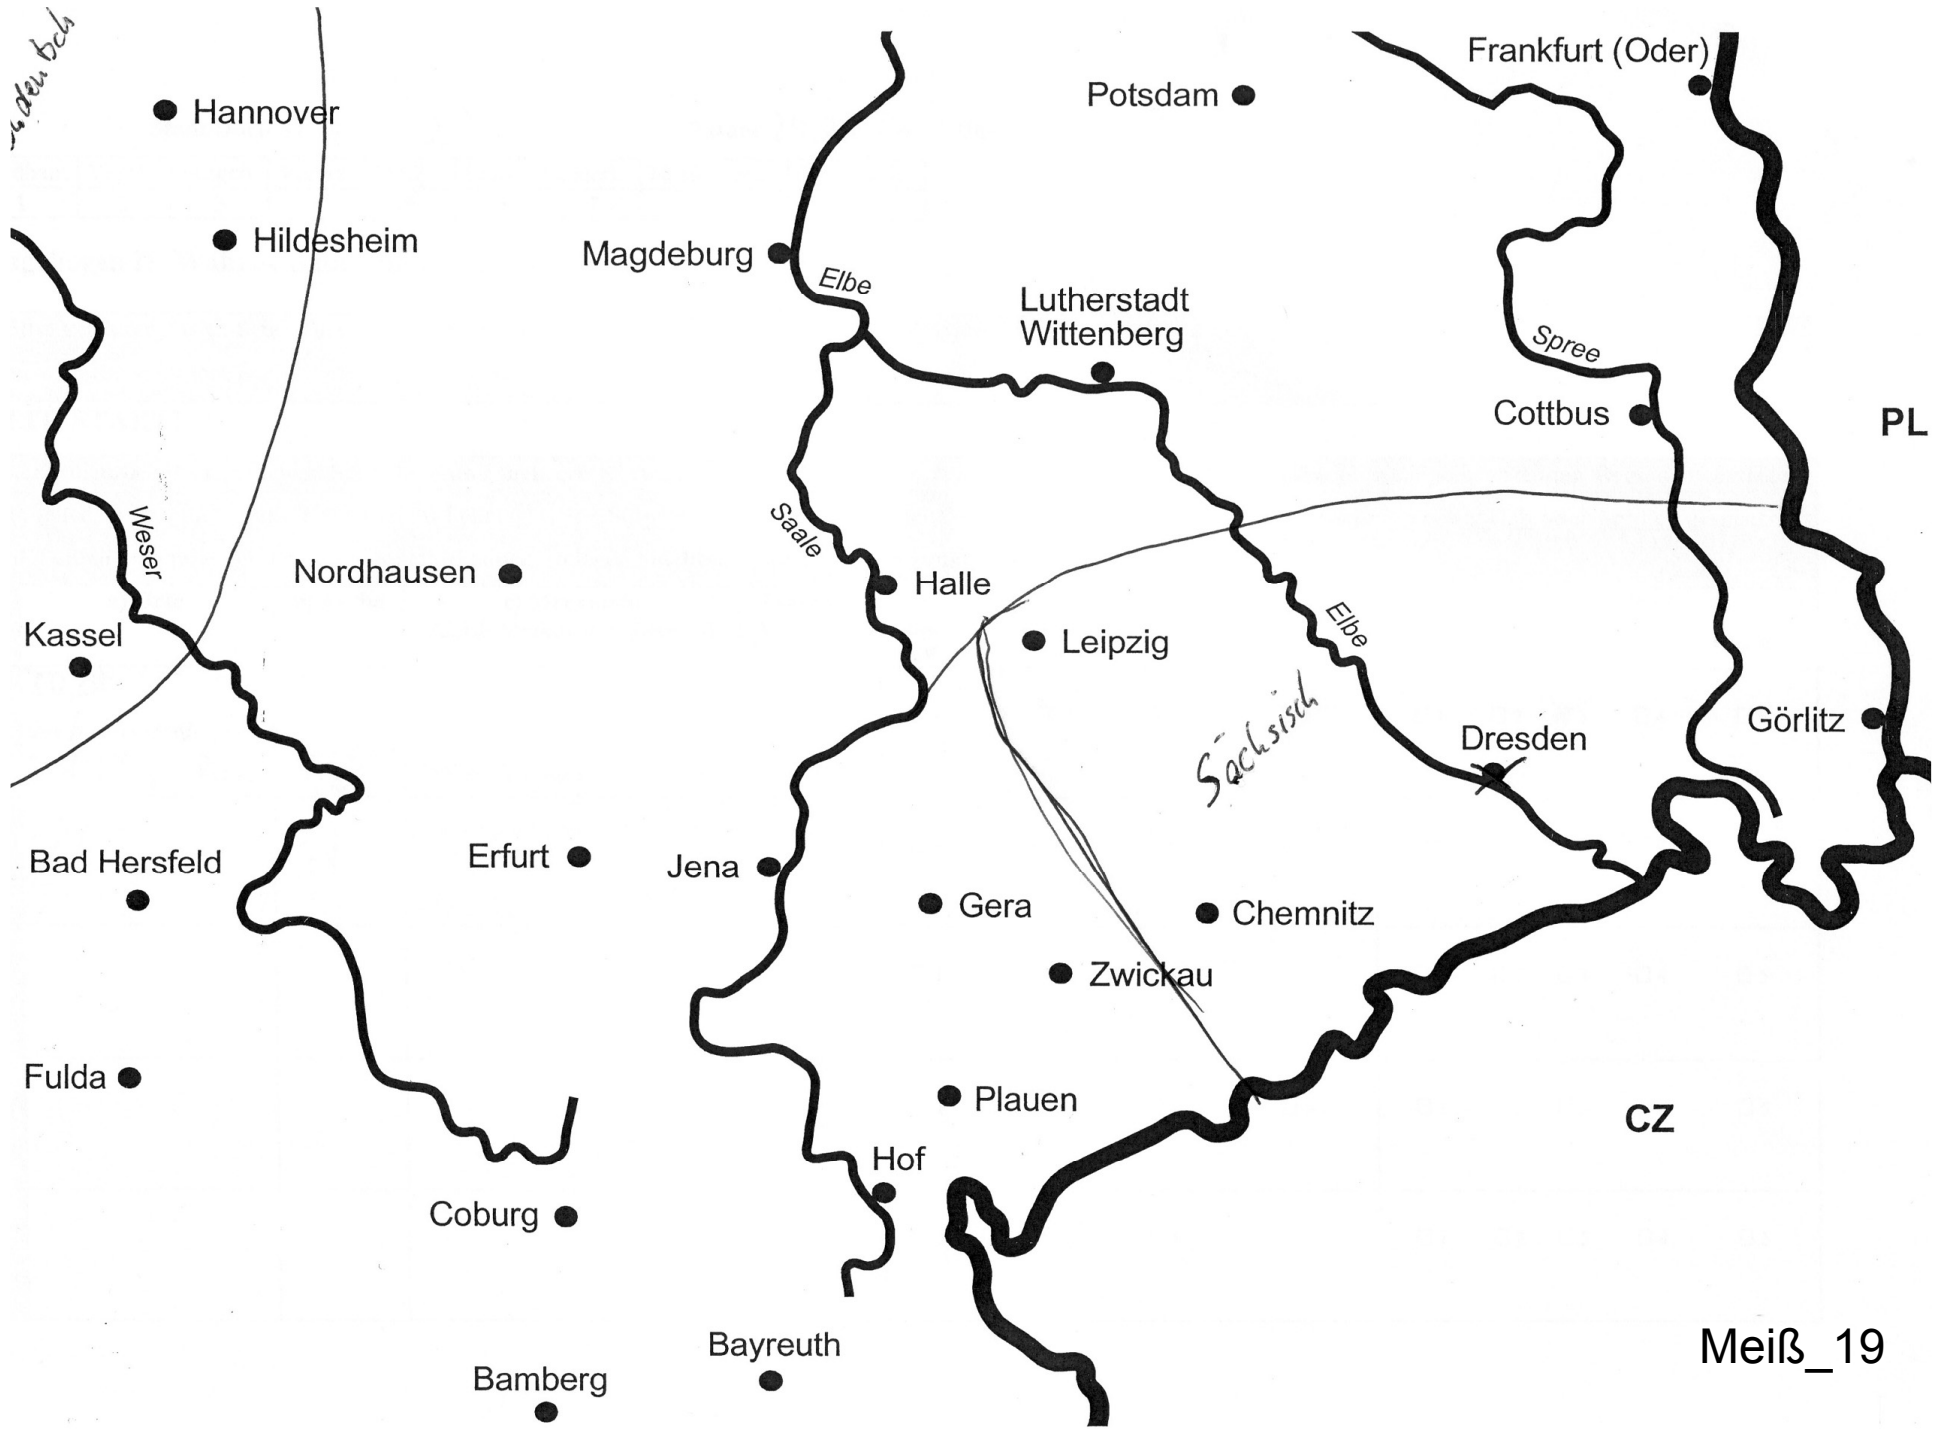

MeiB\_19

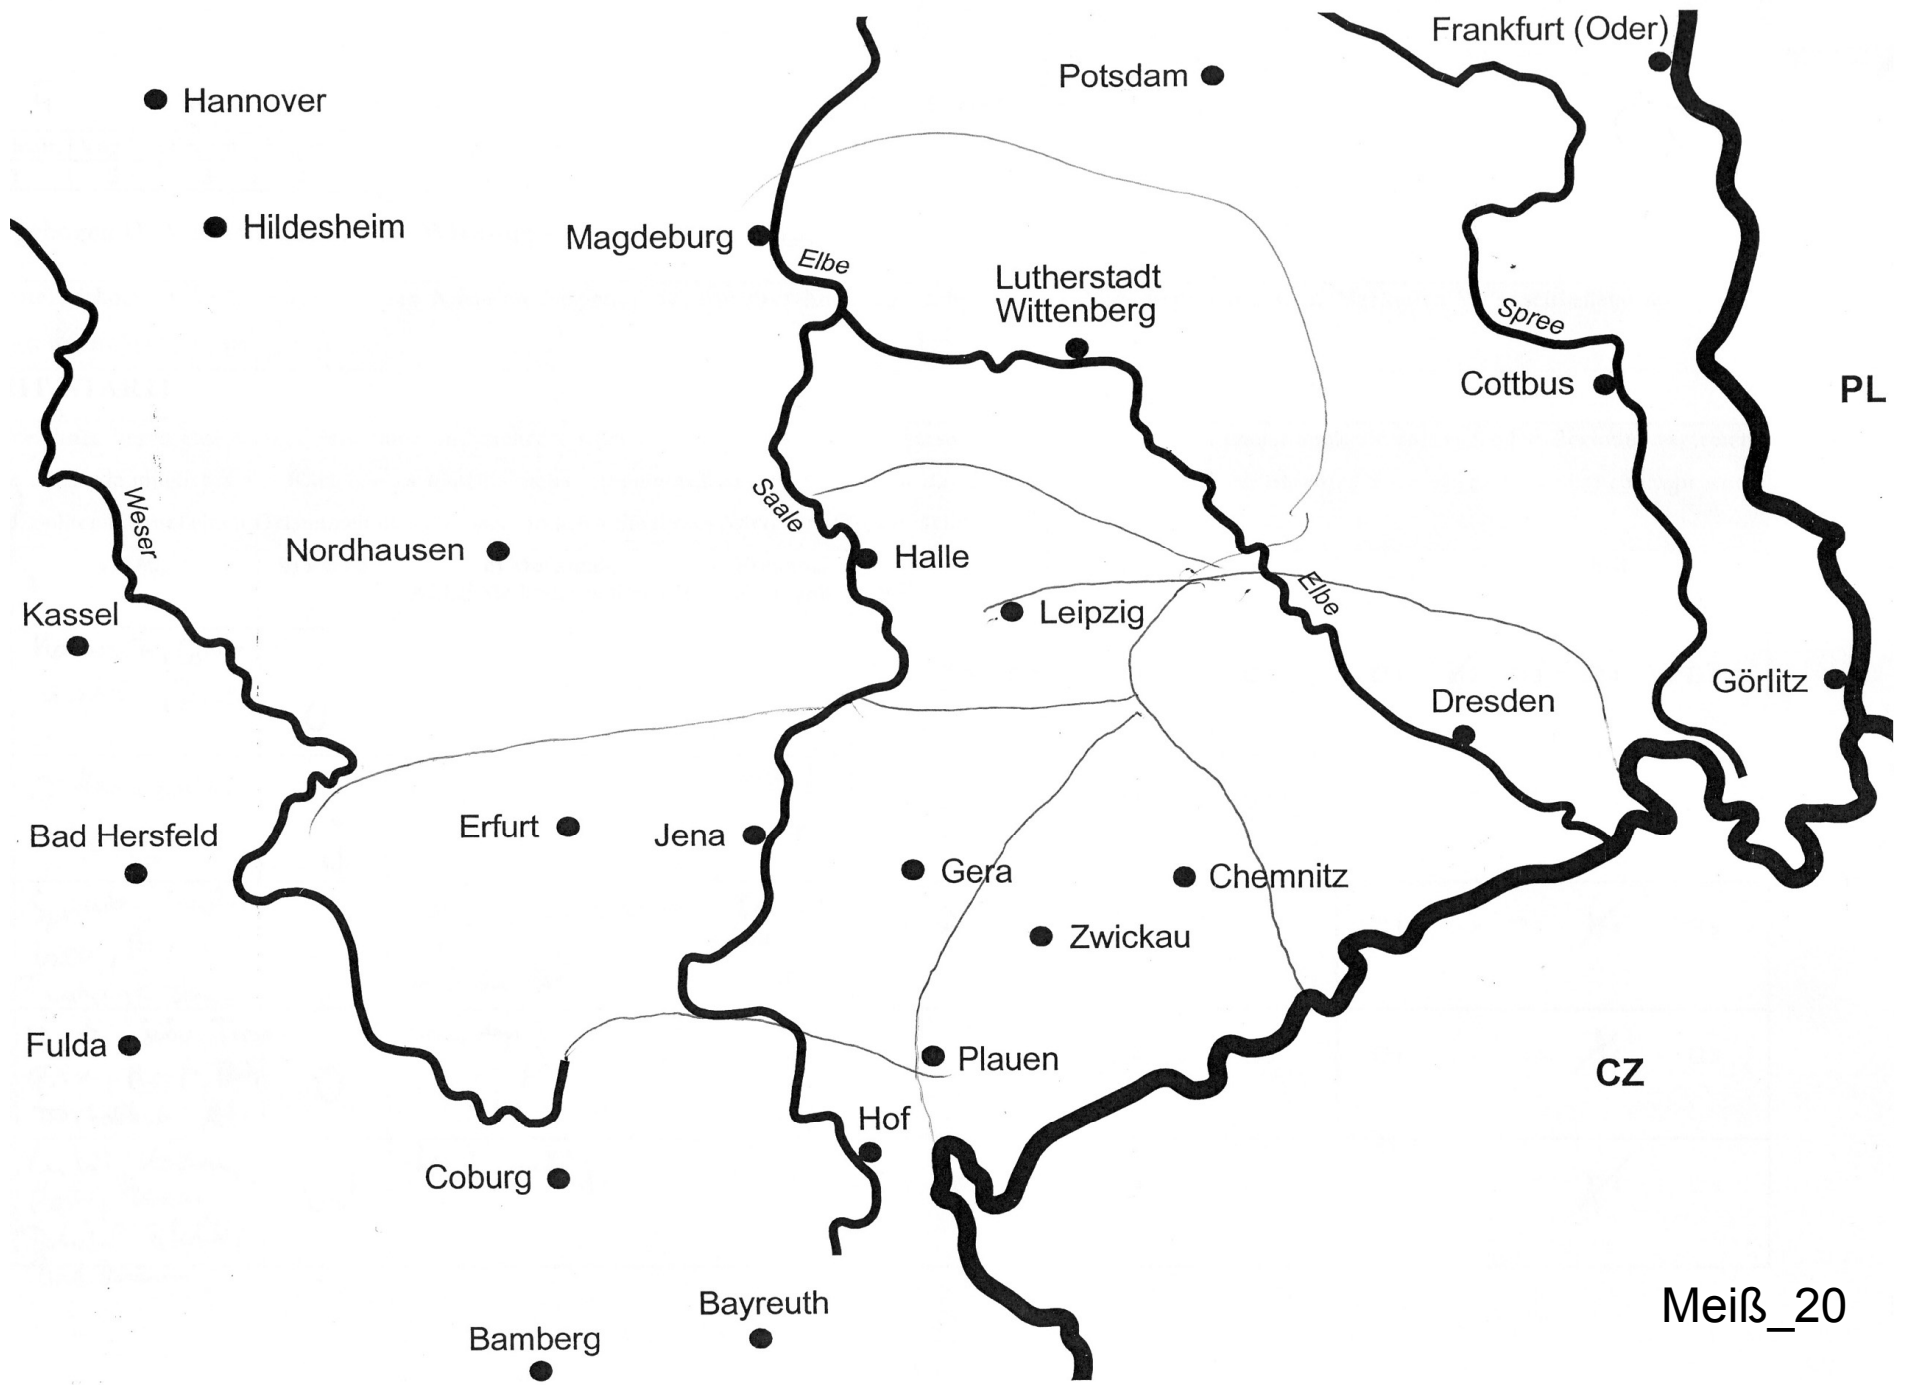

Meiß\_20



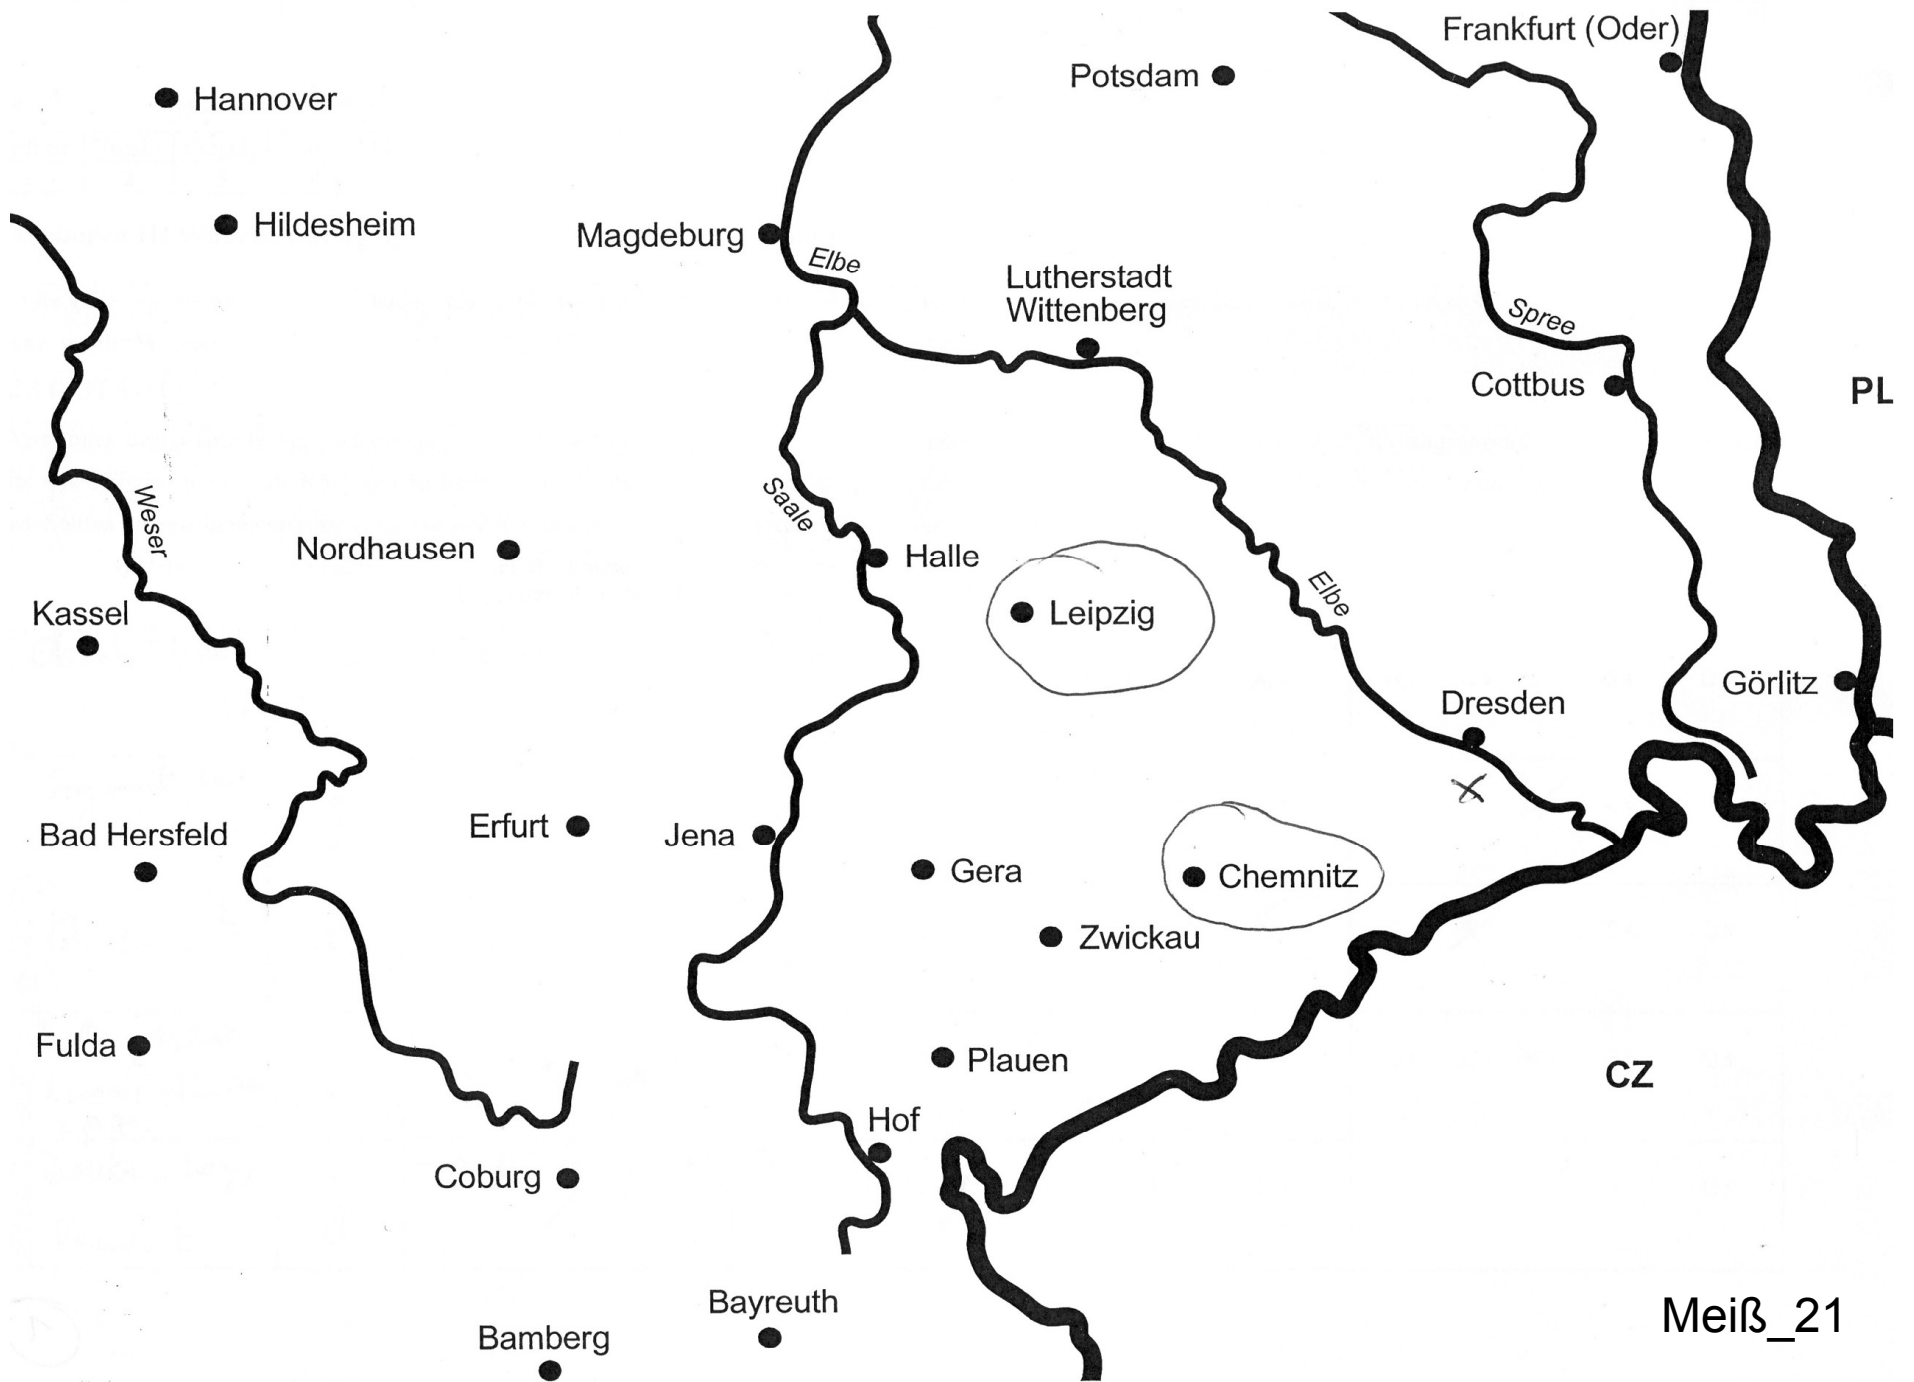

Mei3\_21

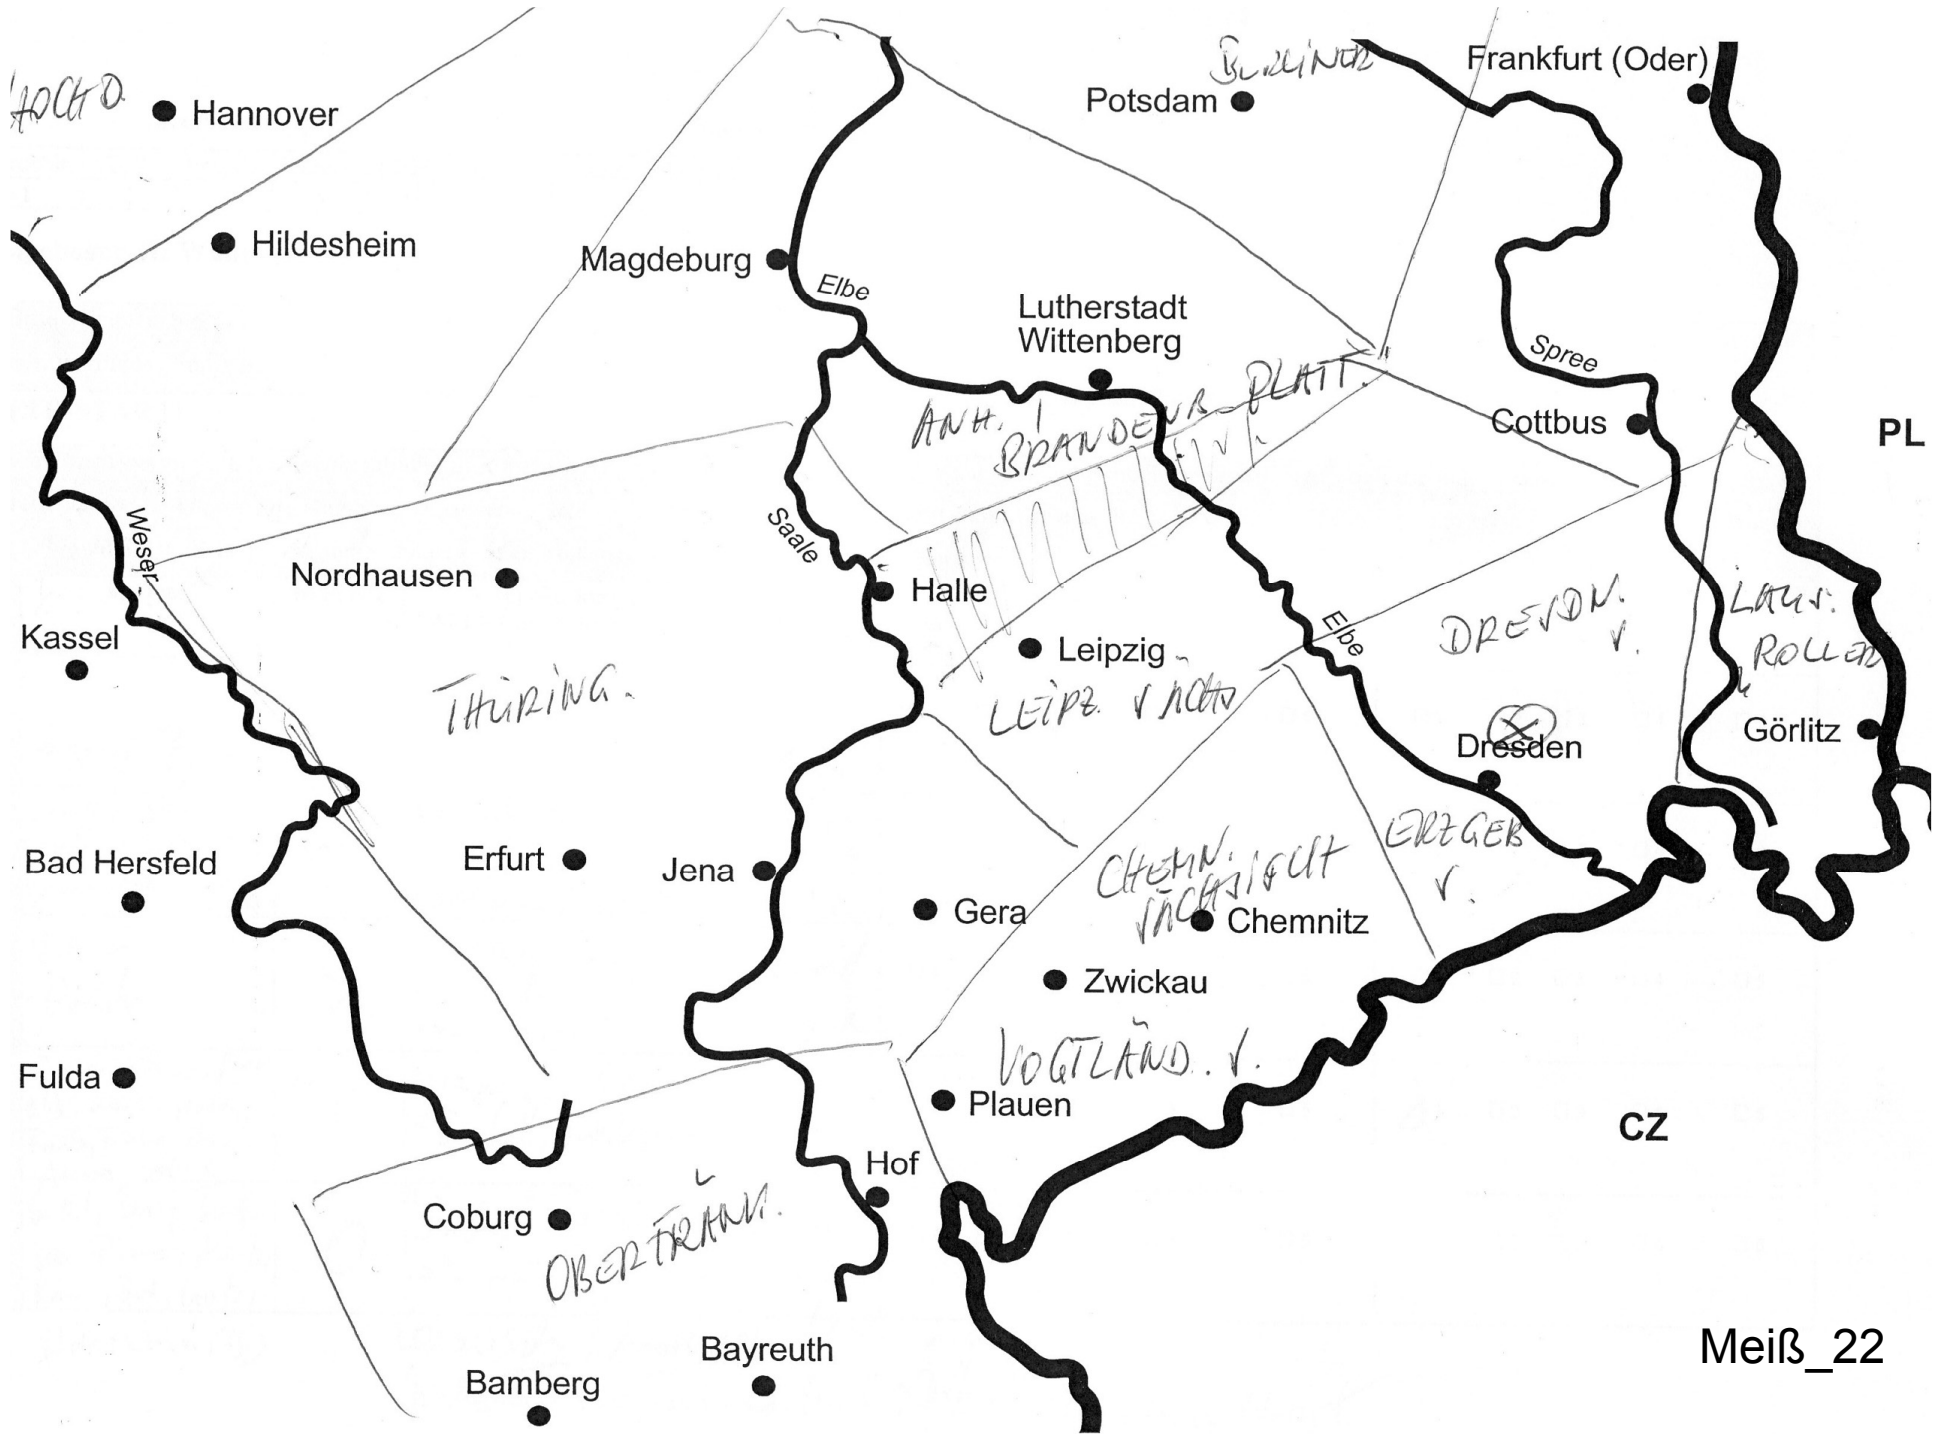

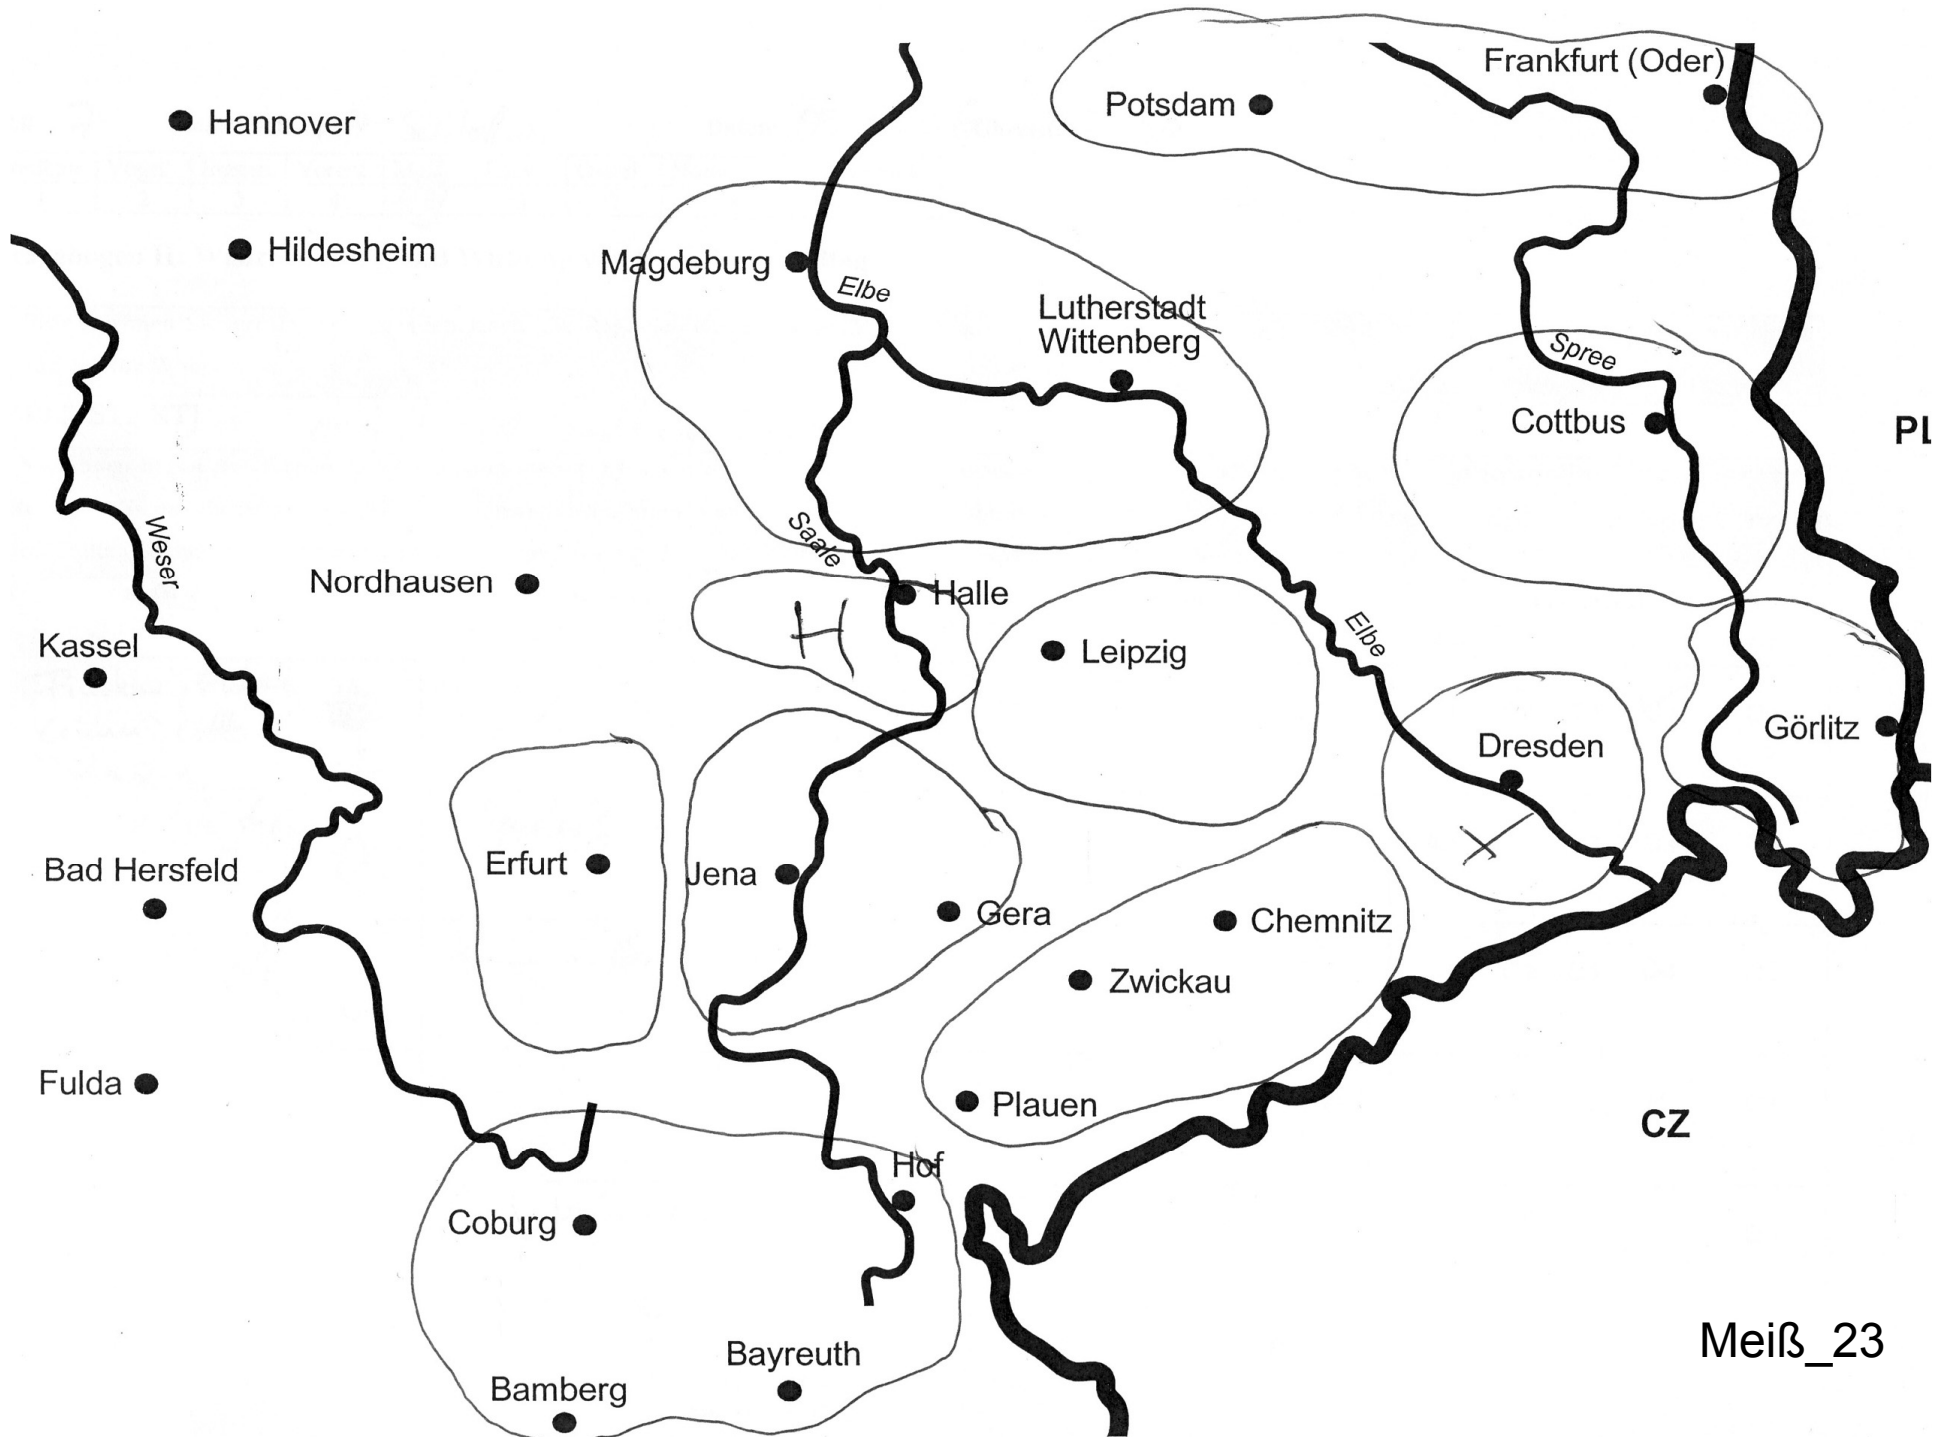

MeiB\_23

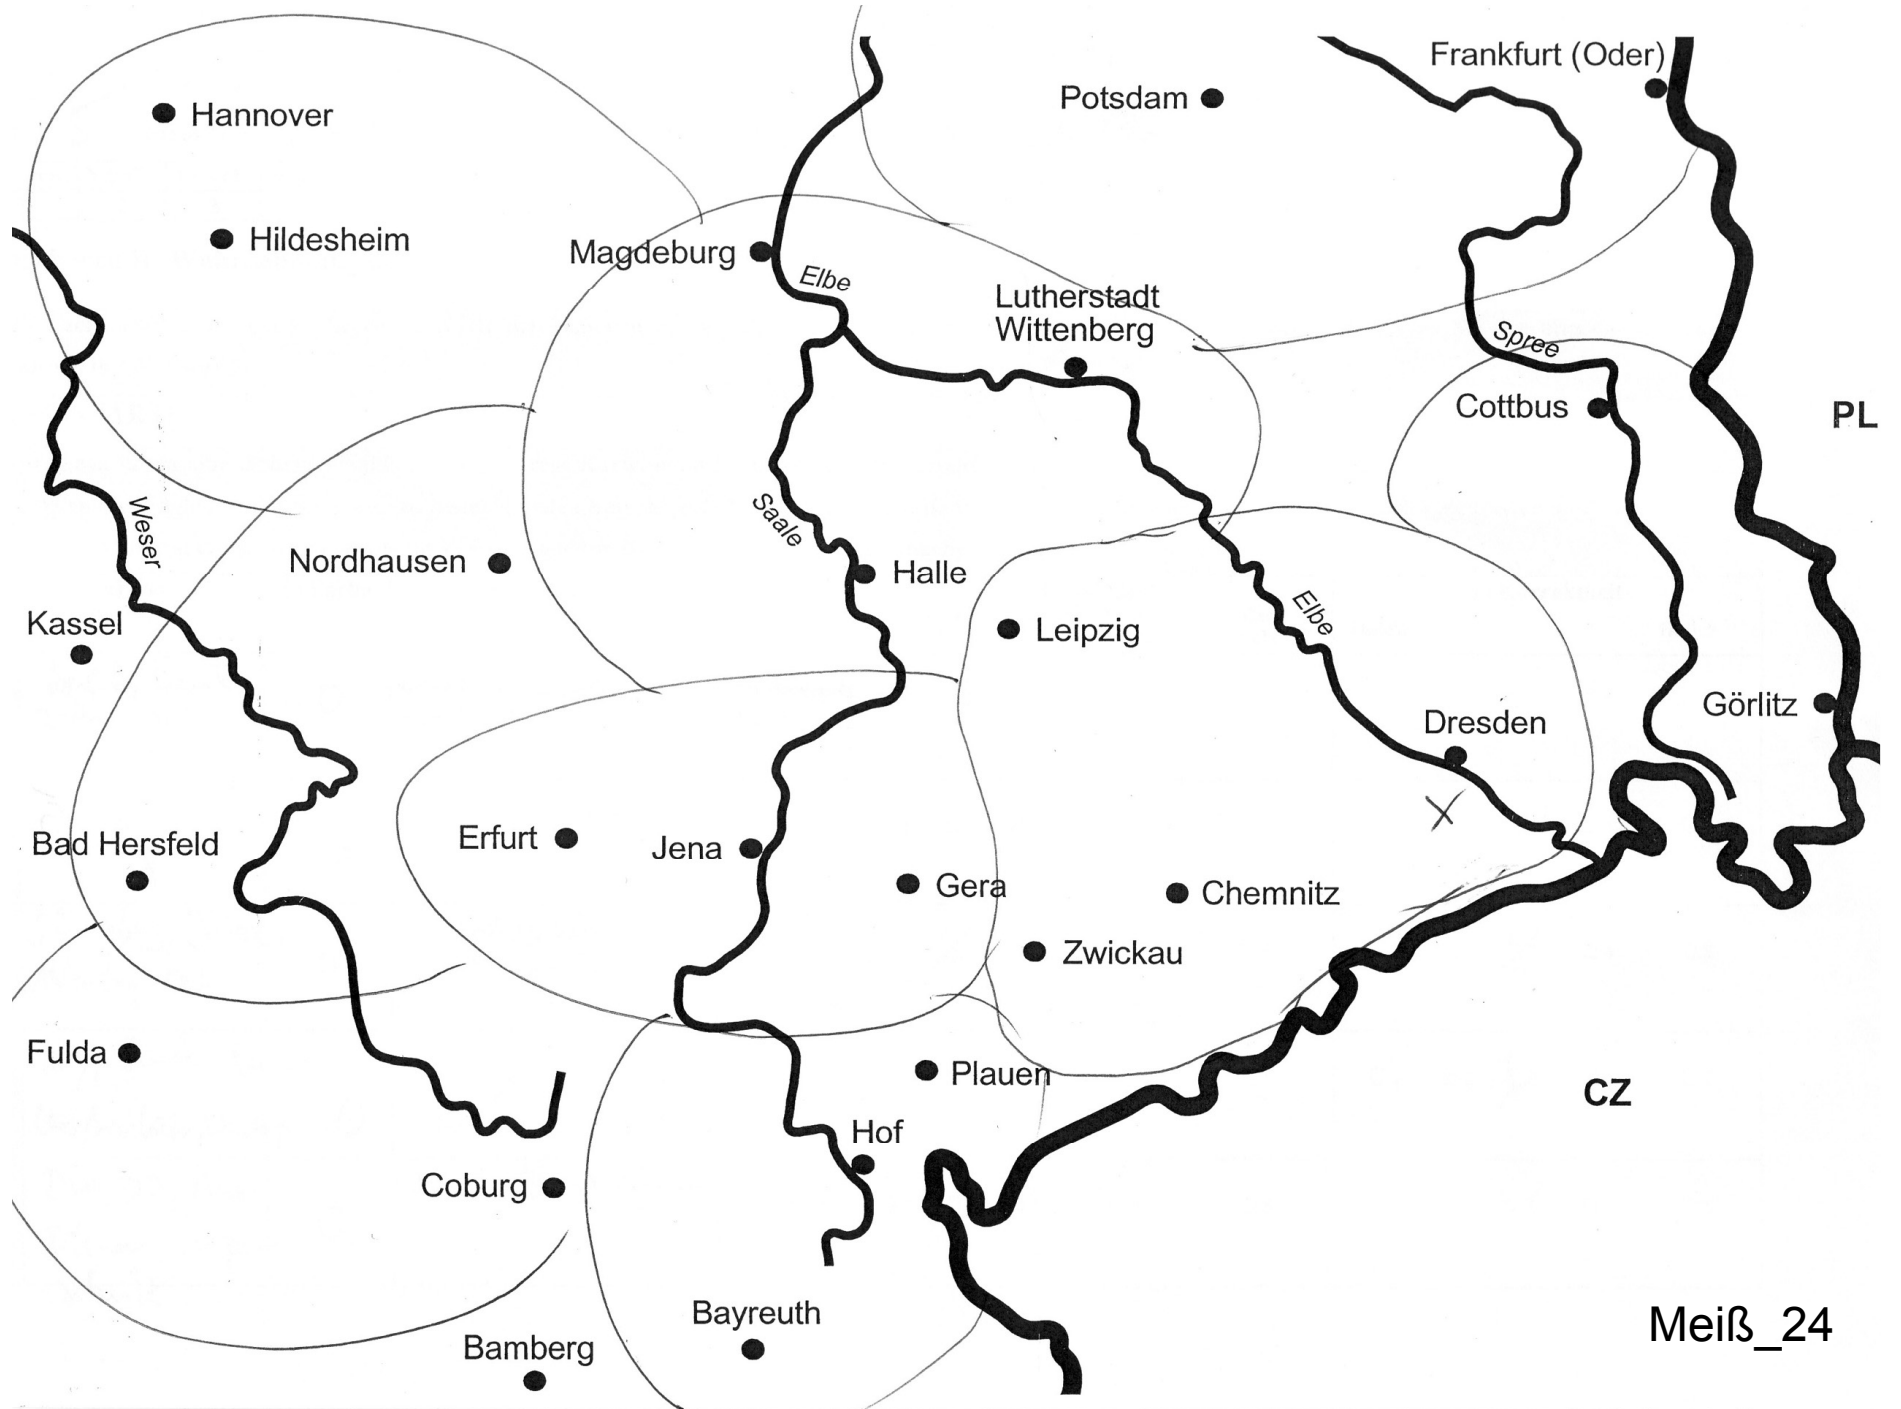

MeiB\_24





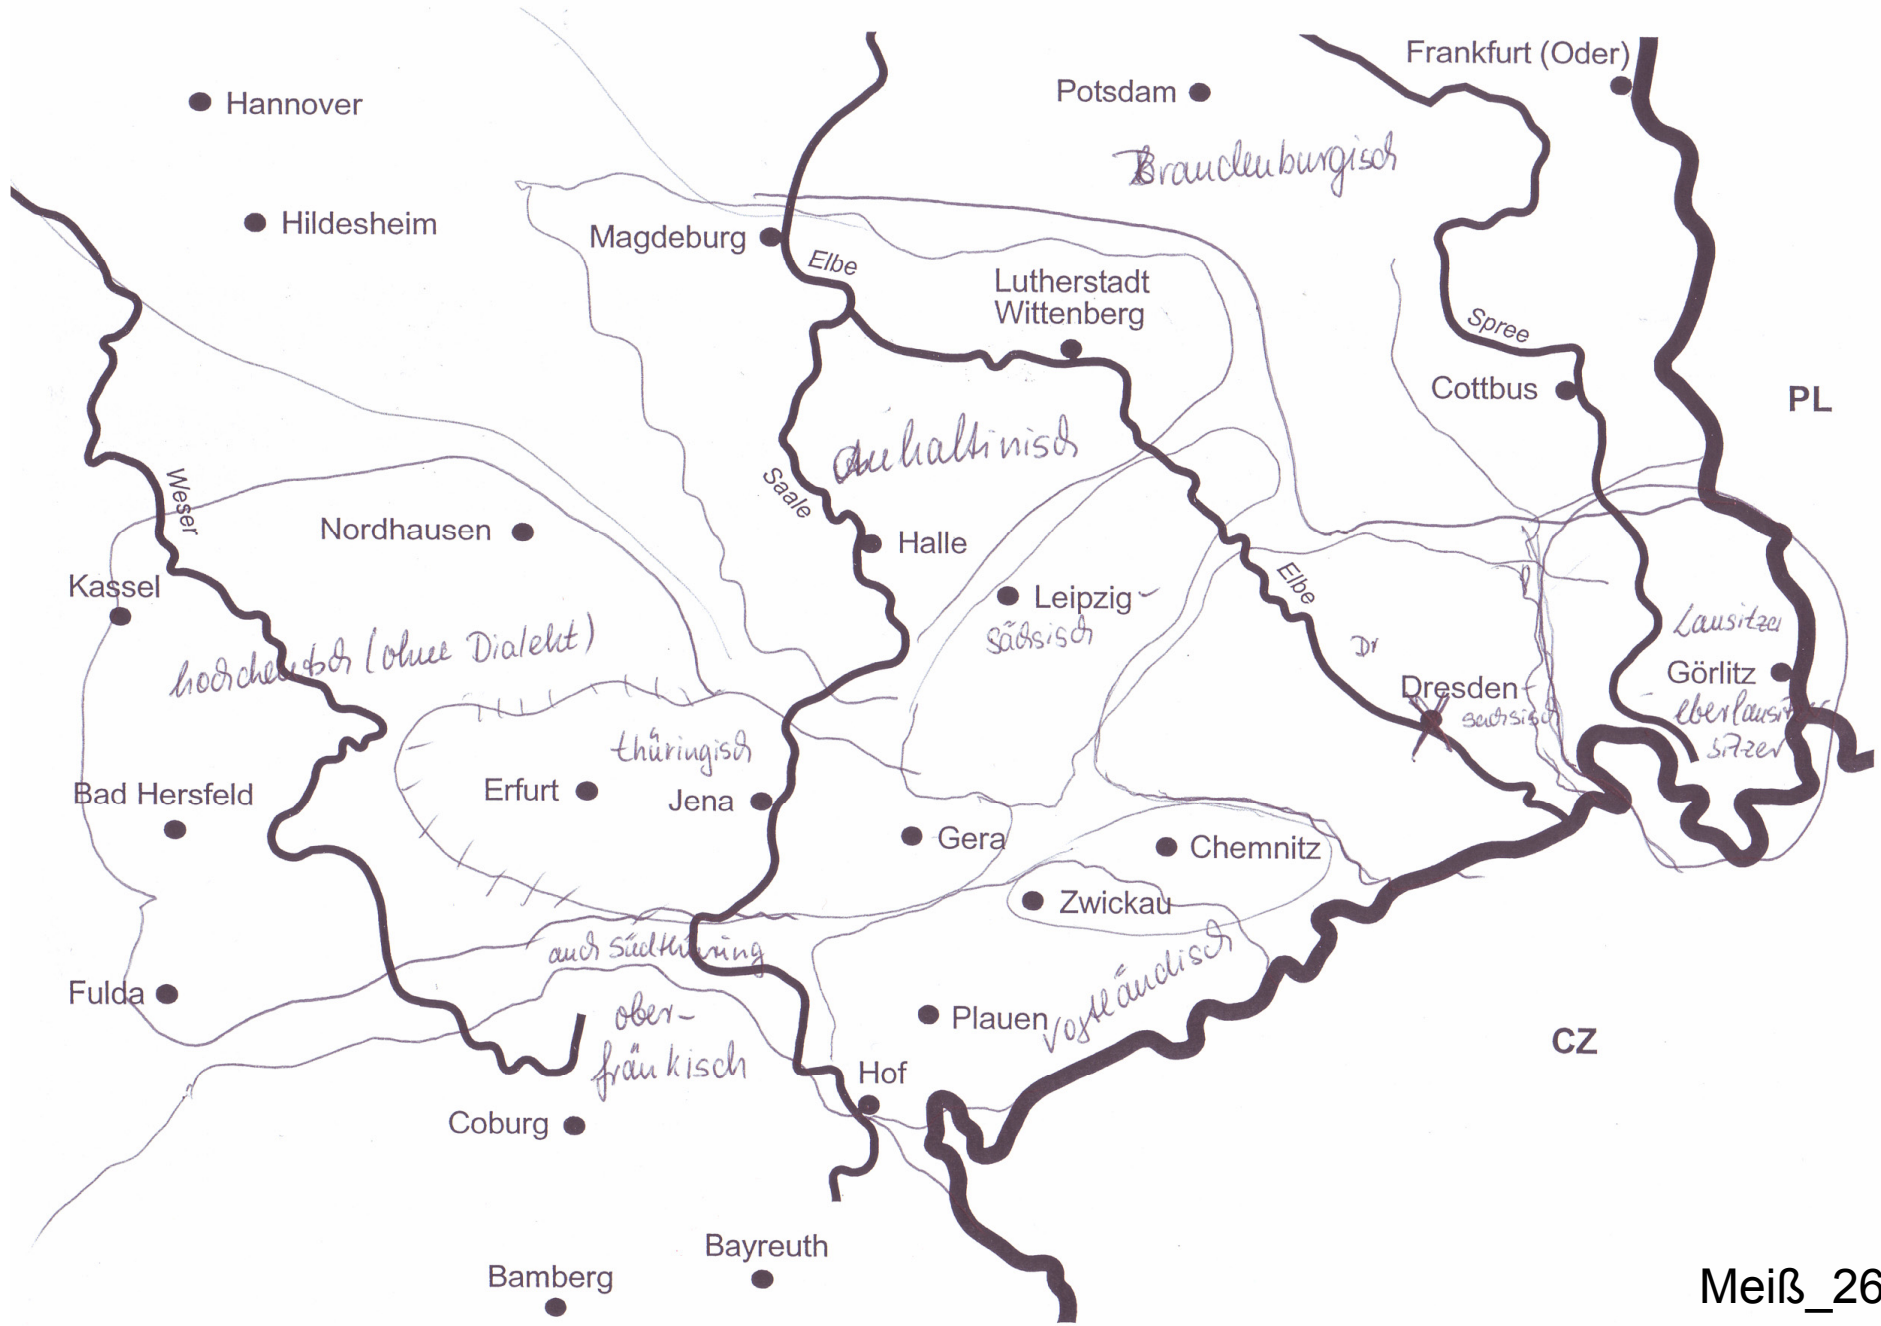

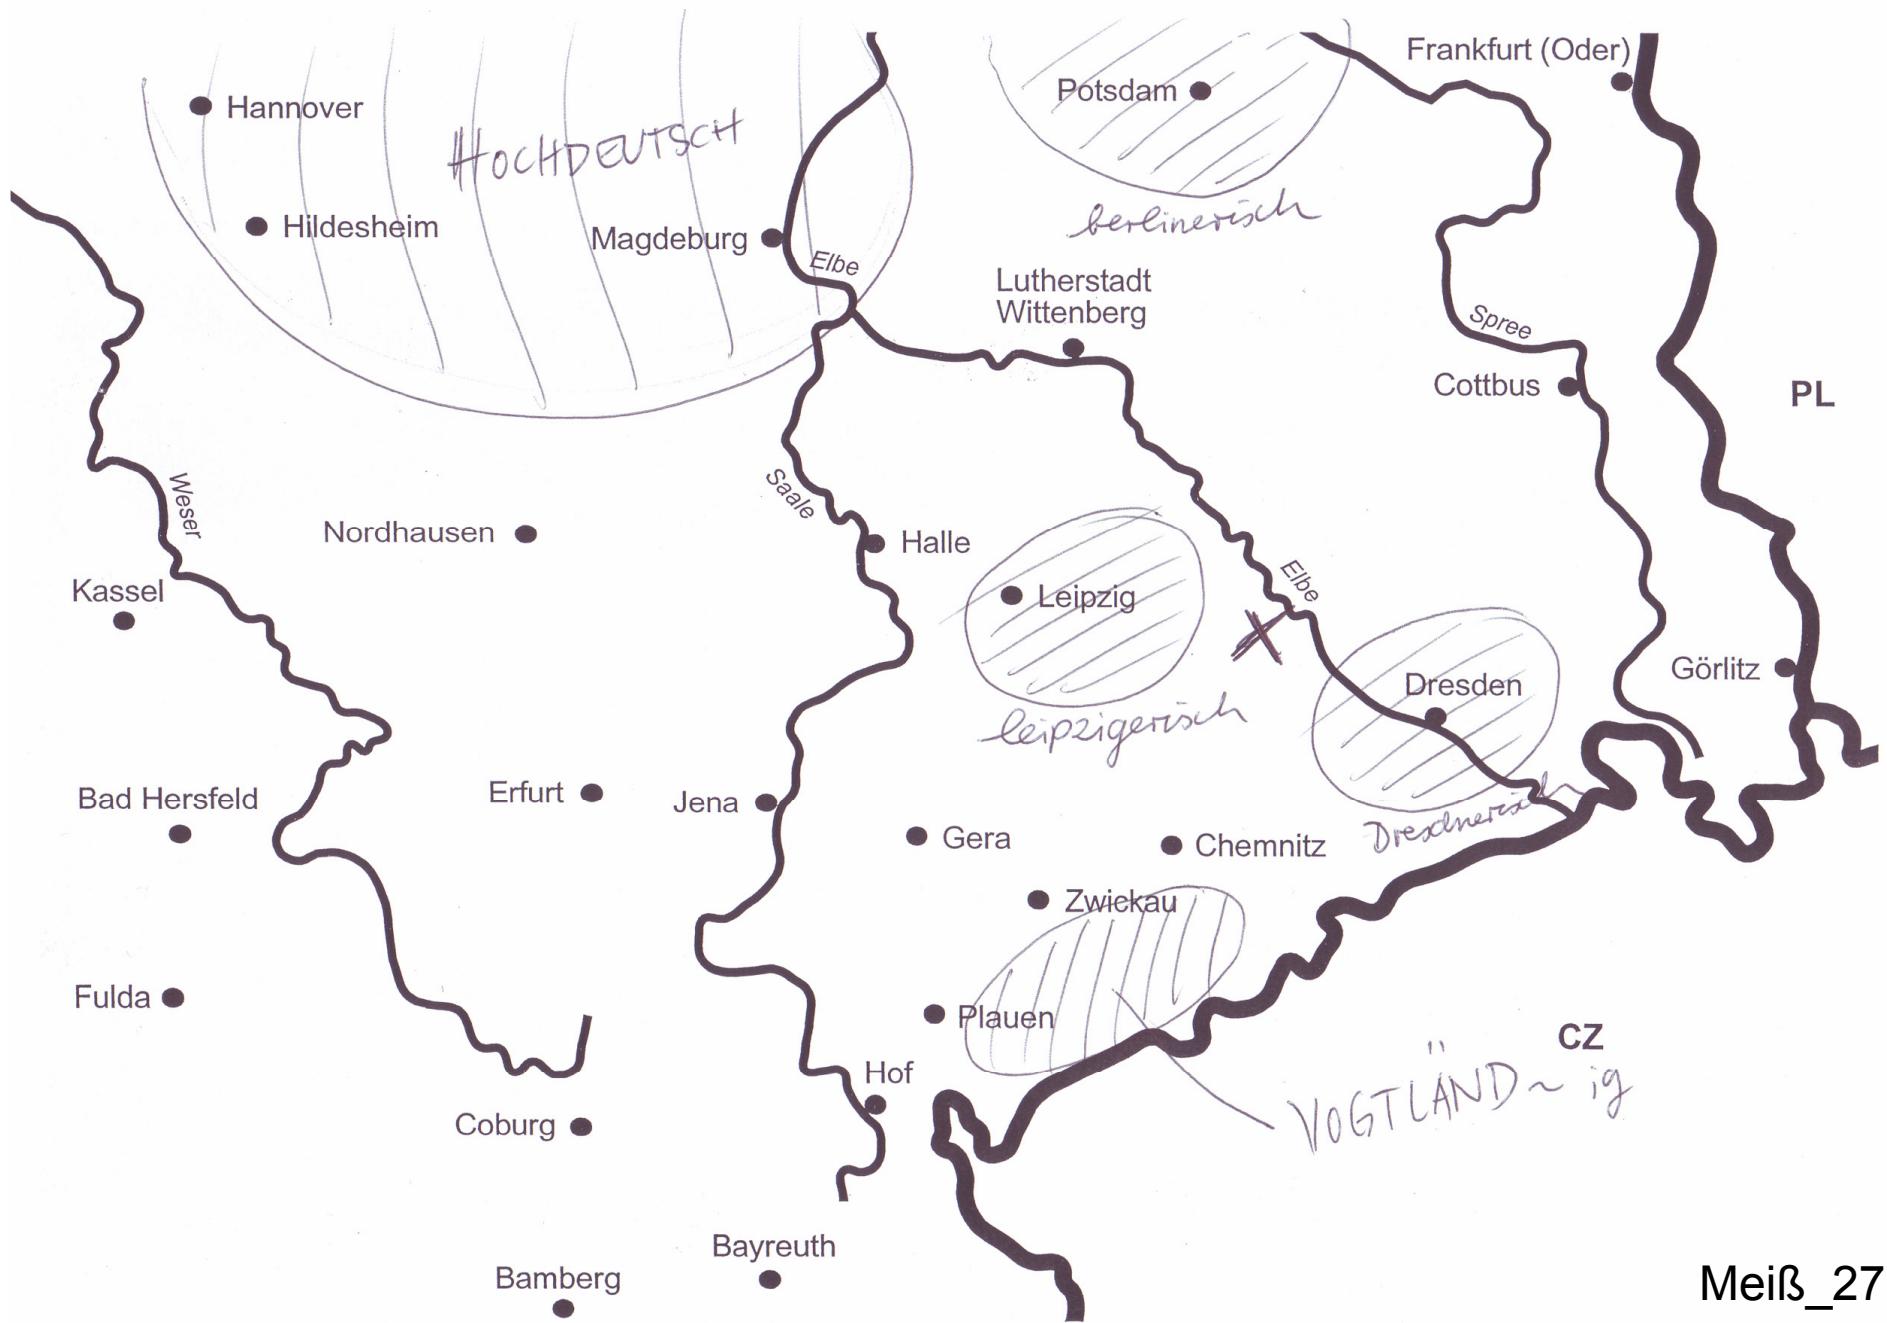

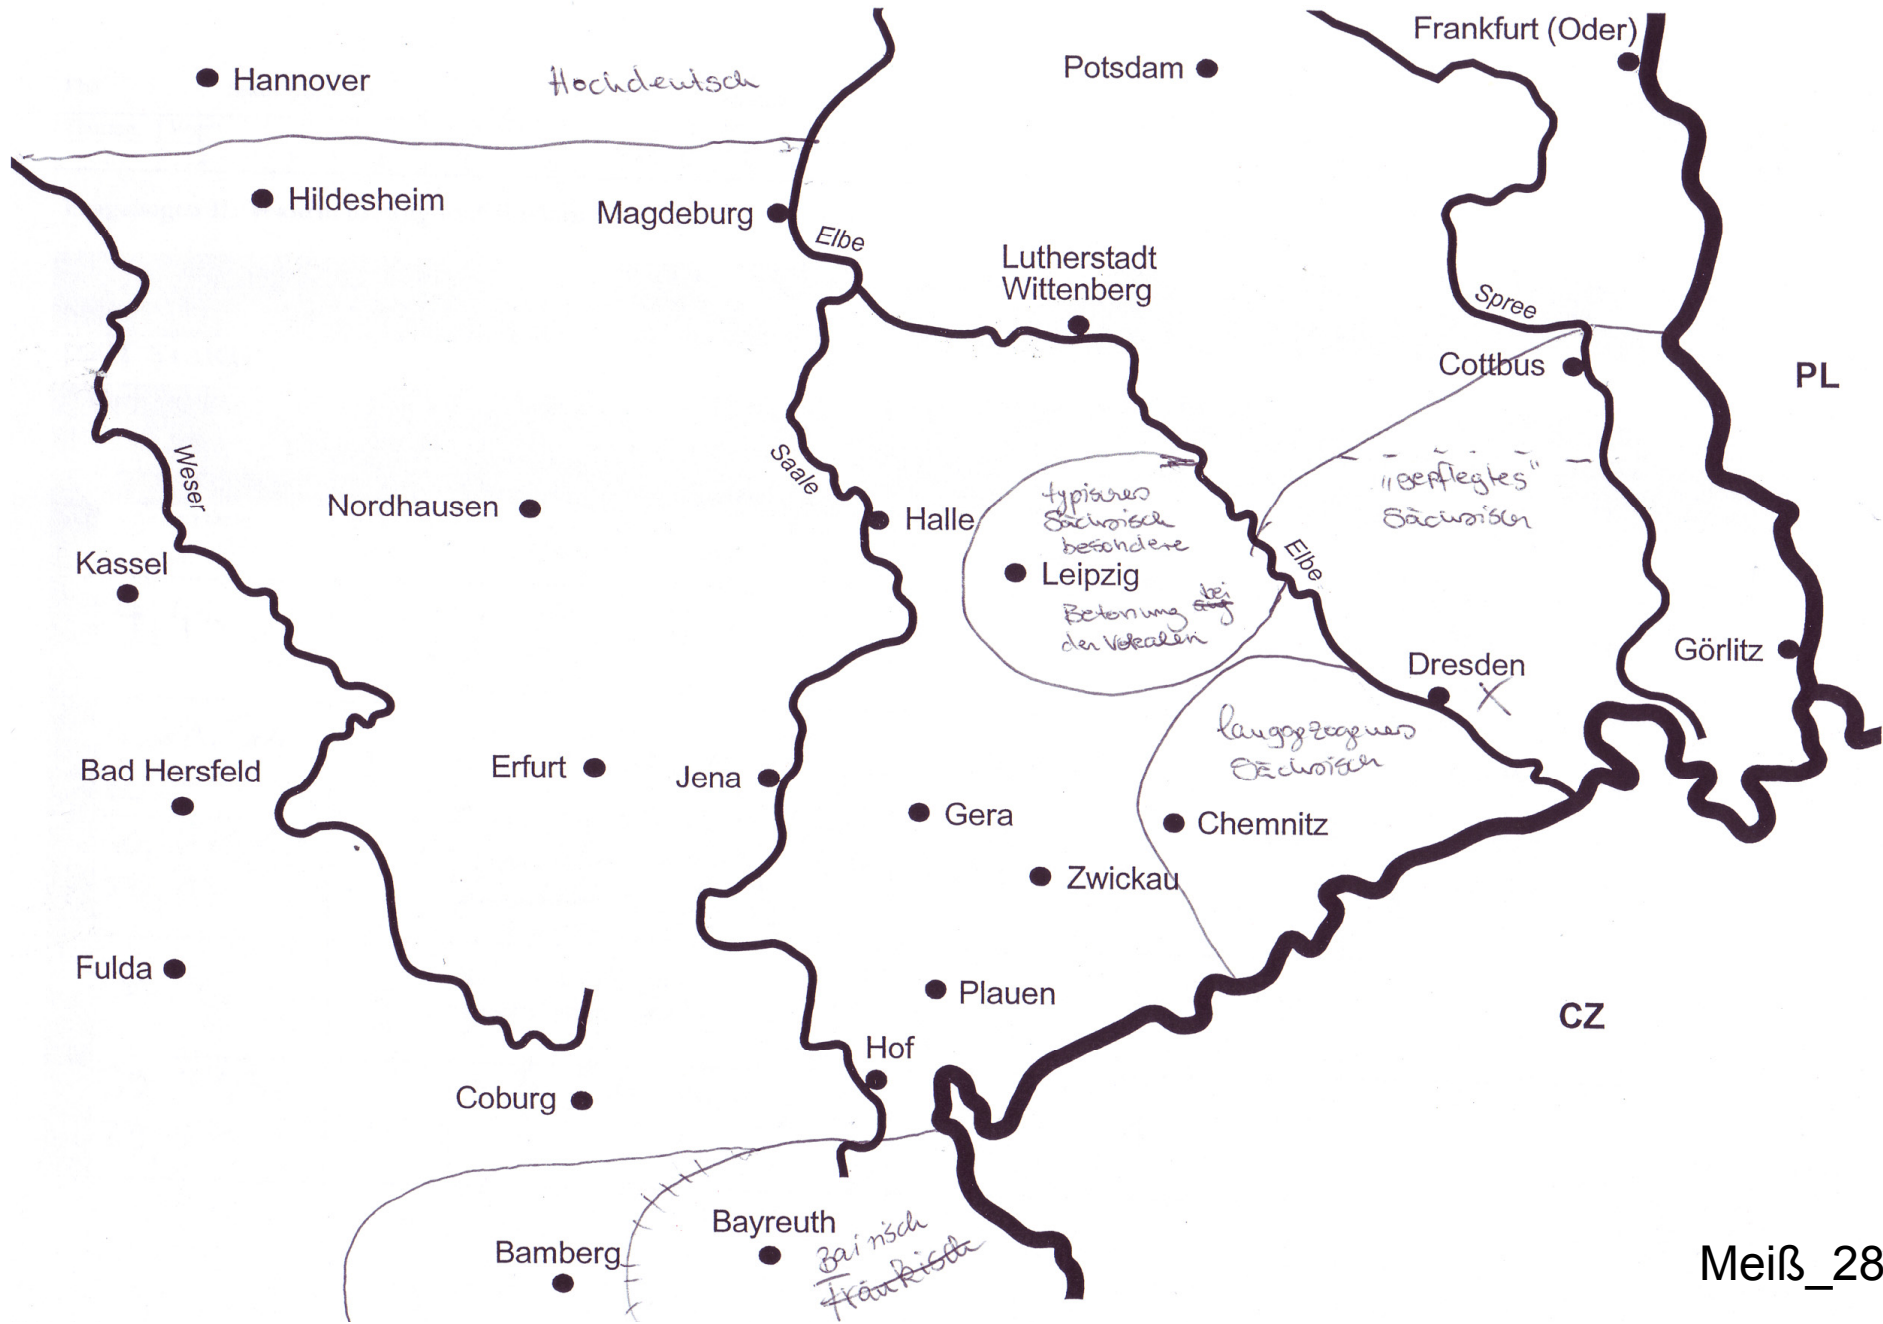



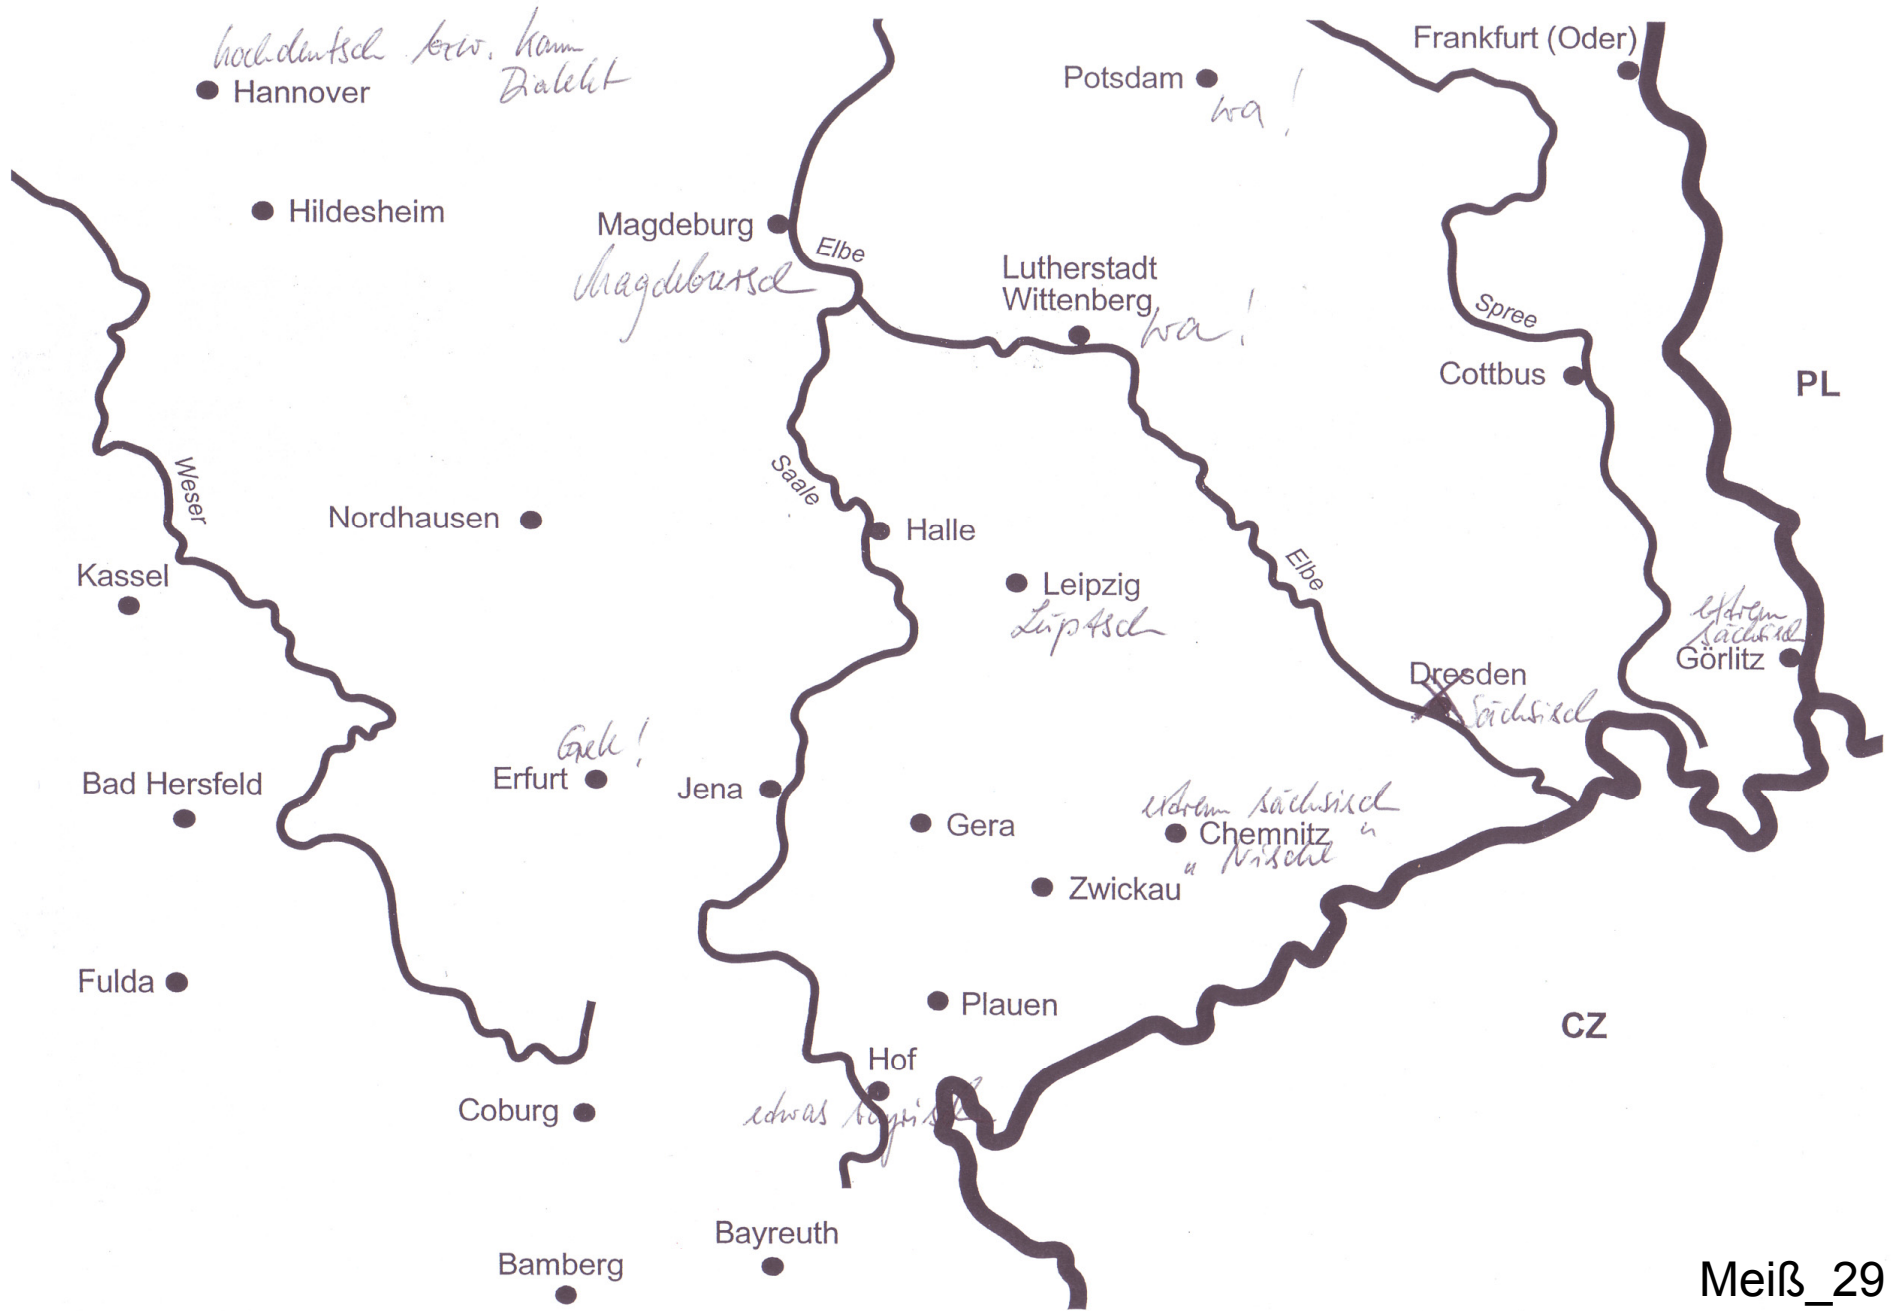

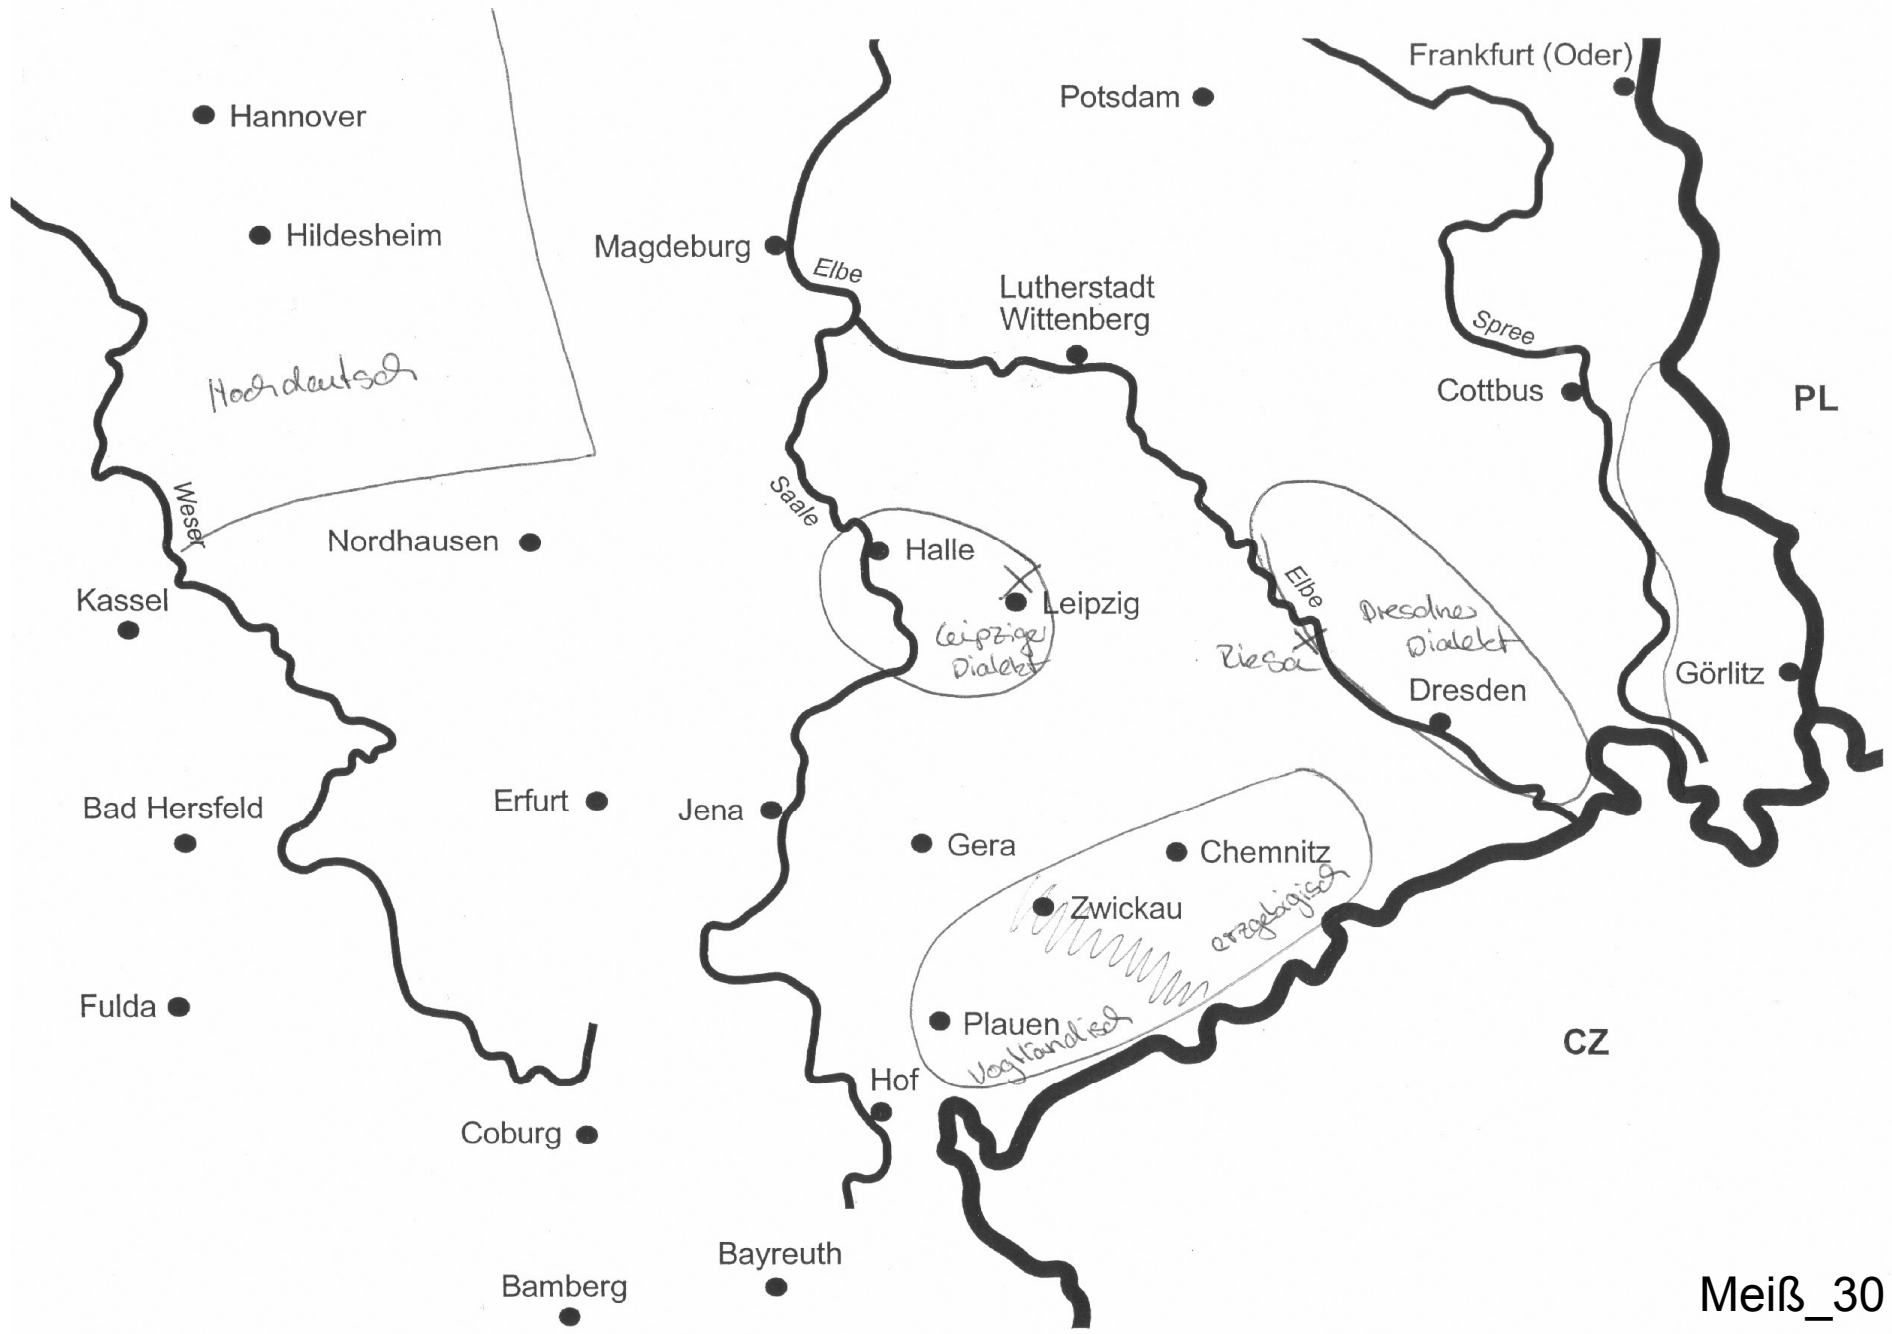

Supplement: Supplementary file 1 [file 9783110221343_Titel_01.pdf]
